# 1 Transcriptome and histone epigenome of *Plasmodium vivax* 2 salivary-gland sporozoites point to tight regulatory control 3 and potential mechanisms for liver-stage differentiation.

4  
5 Vivax Sporozoite Consortium\* (Ivo Muller<sup>1,2,3</sup>, Aaron R. Jex<sup>1,3,4</sup>, Stefan H. I. Kappe<sup>5</sup>,  
6 Sebastian A. Mikolajczak<sup>5</sup>, Jetsumon Sattabongkot<sup>7</sup>, Rapatbhorn Patrapuvich<sup>6</sup>, Scott  
7 Lindner<sup>8</sup>, Erika L. Flannery<sup>5</sup>, Cristian Koepfli<sup>1</sup>, Brendan Ansell<sup>4</sup>, Anita Lerch<sup>1</sup>, Samantha J  
8 Emery-Corbin<sup>1</sup>, Sarah Charnaud<sup>1</sup>, Jeffrey Smith<sup>1</sup>, Nicolas Merrienne<sup>2</sup>, Kristian E.  
9 Swearingen<sup>5</sup>, Robert L. Moritz<sup>9</sup>, Michaela Petter<sup>10,11</sup>, Michael Duffy<sup>10</sup>, Vorada Chuenchob<sup>5</sup>).

10 \*Group authorship – all authors are equal contributors (order per author contributions section below).

- 11 1. Population Health and Immunity Division, The Walter and Eliza Hall Institute for Medical Research, 1G Royal Parade,  
12 Parkville, Victoria, 3052, Australia.
- 13 2. Malaria: Parasites & Hosts Unit, Institut Pasteur, 28 Rue de Dr. Roux, 75015, Paris, France.
- 14 3. Department of Medical Biology, The University of Melbourne, Victoria, 3010, Australia.
- 15 4. Faculty of Veterinary and Agricultural Sciences, The University of Melbourne, Corner of Park and Flemington Road,  
16 Parkville, Victoria, 3010, Australia.
- 17 5. Center for Infectious Disease Research, 307 Westlake Avenue North, Suite 500, Seattle, WA 98109, USA;
- 18 6. Department of Global Health, University of Washington, Seattle, WA 98195, USA.
- 19 7. Mahidol *Vivax* Research Center, Faculty of Tropical Medicine, Mahidol University, Bangkok 10400, Thailand.
- 20 8. Department of Biochemistry and Molecular Biology, Center for Malaria Research, Pennsylvania State University, University  
21 Park, PA 16802, USA.
- 22 9. Institute for Systems Biology, Seattle, WA, 98109, USA.
- 23 10. Department of Medicine Royal Melbourne Hospital, The Peter Doherty Institute, The University of Melbourne, 792  
24 Elizabeth Street, Melbourne, Victoria 3000, Australia.
- 25 11. Institute of Microbiology, University Hospital Erlangen, Erlangen 91054, Germany

## 26 27 28 **ABSTRACT**

29 *Plasmodium vivax* is the key obstacle to malaria elimination in Asia and Latin America,  
30 largely attributed to its ability to form resilient ‘hypnozoites’ (sleeper-cells) in the host liver  
31 that cause relapsing infections. The decision to form hypnozoites is made early in the liver  
32 infection and may be set in sporozoites prior to invasion. To better understand these early  
33 stages of infection, we undertook transcriptomic and histone epigenetic characterization of *P.*  
34 *vivax* sporozoites. Through comparisons to recently published proteomic data for the *P. vivax*  
35 sporozoite, our study highlights the loading of the salivary-gland sporozoite with proteins  
36 required for cell traversal and invasion and transcripts for infection of and development  
37 within hepatocytes. Though highly transcribed, these transcripts are not detectable as proteins,  
38 indicating they may be regulated in the sporozoite through translational repression. We also  
39 undertook differential transcriptomic studies comparing the sporozoite with newly published  
40 mixed blood-stage and mixed versus hypnozoite-enriched liver stage transcriptomes. These  
41 comparisons indicate multiple layers of transcriptional, post-transcriptional and post-  
42 translational control active in the sporozoite stage and to a lesser extent hypnozoites, but  
43 largely absent in mixed liver or blood-stages. Common transcripts up-regulated in sporozoites  
44 and hypnozoites compared to mixed stages include several AP2 transcription factors,  
45 translational repressors and histone epigenetic regulators, as well as genes linked to  
46 dormancy/persistence in bacteria, amoebae and plants. We characterise histone epigenetic  
47 modifications in the *P. vivax* sporozoite and explore their role in regulating transcription. This  
48 work shows a close correlation between H3K9ac marks and transcriptional activity, with  
49 H3K4me3 and H3K9me3 appearing to act as general markers of euchromatin and  
50 heterochromatin respectively. We also show little evidence of transcriptional activity in the  
51 (sub)telomeres in sporozoites and discuss potential roles of AP2 transcription factors,  
52 including ApiAP2-L in regulating this stage. Collectively, these data indicate the sporozoite  
53 as a tightly programmed stage primed to infect the human host and identifies key targets to be  
54 further explored in liver stage models.

## 55 56 **Author summary**

57 Our study is the first to use RNA-seq and ChIP-seq technologies to comprehensively  
58 characterize the *P. vivax* sporozoite transcriptome and histone epigenome, and the first to

59 integrate these technologies with proteomic studies to explore translational repression in the  
60 sporozoite of any *Plasmodium* spp. Our study improves on previous work in this field and is  
61 supported by recent publication of the transcriptome/histone epigenome of *P. falciparum* and  
62 the liver-stage transcriptomes of a related simian parasite (*P. cynomolgi*) that also forms  
63 dormant liver stages. Collectively, these data characterize the infectious sporozoite as a highly  
64 programmed and tightly regulated, ‘torpedo’-like stage primed to infect the human host and  
65 suggests that hypnozoite formation is mediated both by differential signals in the sporozoite  
66 and by developmental arrest regulators that suppress further development to the schizont  
67 stage. This work reveals the primary importance of translational repression and chromatin  
68 epigenetics in this process. Our study provides a foundation for exploring the genetic  
69 differences between sporozoites derived from parasites with broadly differing hypnozoite  
70 formation and relapse phenotypes and highlights genes of major importance in liver stage  
71 development that may now be rationally investigated (including as potential drug targets) in  
72 relevant models.

## 73 74 INTRODUCTION

75 Malaria is among the most significant infectious diseases impacting humans globally, with  
76 3.3 billion people at risk of infection, 381 million suspected clinical cases and up to ~660,000  
77 deaths attributed to malaria in 2014 [1]. Two major parasitic species contribute to the vast  
78 majority of human malaria, *Plasmodium falciparum* and *P. vivax*. Historically, *P. falciparum*  
79 has attracted the majority of global attention, due to its higher contribution to morbidity and  
80 mortality. However, *P. vivax* is broadly distributed, more pathogenic than previously thought,  
81 and is recognised as the key obstacle to malaria elimination in the Asia-Pacific and Americas  
82 [2]. Unlike *P. falciparum*, *P. vivax* can establish long-lasting ‘sleeper-cells’ (= hypnozoites)  
83 in the host liver that emerge weeks, months or years after the primary infection (= relapsing  
84 malaria) [3]. Primaquine is the only approved drug that prevents relapse. However, the short  
85 half-life, long dosage regimens and incompatibility of primaquine with glucose-6-phosphate-  
86 dehydrogenase deficiency (which requires pre-screening of recipients [4]) makes it unsuitable  
87 for widespread use. As a consequence, *P. vivax* is overtaking *P. falciparum* as the primary  
88 cause of malaria in a number of co-endemic regions [5]. Developing new tools to diagnose,  
89 treat and/or prevent hypnozoite infections is considered one of the highest priorities in the  
90 malaria elimination research agenda [6].

91 When *Plasmodium* sporozoites are deposited by an infected mosquito, they likely  
92 traverse the skin cells, enter the blood-stream and are trafficked to the host liver, as has been  
93 shown in rodents [7]. The sporozoites’ journey from skin deposition to hepatocytes takes less  
94 than a few minutes [8]. Upon reaching the liver, sporozoites traverse Kupffer and endothelial  
95 cells to reach the parenchyma, moving through several hepatocytes before invading a final  
96 hepatocyte suitable for development [7, 9]. Within hepatocytes, these parasites replicate, and  
97 undergo further development and differentiation to produce merozoites that emerge from the  
98 liver and infect red blood cells. However, *P. vivax* sporozoites are able to commit to two  
99 distinct developmental fates within the hepatocyte: they either immediately continue  
100 development as replicating schizonts and establish a blood infection, or delay replication and  
101 persist as hypnozoites. Regulation of this major developmental fate decision is not understood  
102 and this represents a key gap in current knowledge of *P. vivax* biology and control.

103 Sporozoites prepare for mammalian host infection while still residing in the mosquito  
104 salivary glands. It has been hypothesized that *P. vivax* sporozoites exist within an inoculum as  
105 replicating ‘tachysporozoites’ and relapsing ‘bradysporozoites’ [10] and that these  
106 subpopulations may have distinct developmental fates as schizonts or hypnozoites, thus  
107 contributing to their relapse phenotype [10-12]. This observation is supported by the stability  
108 of different hypnozoite phenotypes (ratios of hypnozoite to schizont formation) in *P. vivax*  
109 infections of liver-chimeric mouse models [13]. To determine fates in the sporozoite stage,  
110 control of protein expression must take place. Studies using rodent malaria parasites have  
111 identified genes [14] that are transcribed in sporozoites but translationally repressed (i.e.,  
112 present as transcript but un- or under-represented as protein), via RNA-binding proteins [15],  
113 and ready for immediate translation after the parasites’ infection of the mammalian host cell

114 [13, 16]. It is therefore also possible that translational repression (i.e., the blocking of  
115 translation of present and retained transcripts) and other mechanisms of epigenetic control  
116 may contribute to the *P. vivax* sporozoite fate decision and hypnozoite formation, persistence  
117 and activation. Supporting this hypothesis, histone methyltransferase inhibitors stimulate  
118 increased activation of *P. cynomolgi* hypnozoites to become schizonts in macaque  
119 hepatocytes [17, 18]. Epigenetic control of stage development is further evidenced in  
120 *Plasmodium* through chromatin structure controlling expression of PfAP2-G, a specific  
121 transcription factor that, in turn, regulates gametocyte (dimorphic sexual stages) development  
122 in blood-stages [19]. It is well documented that *P. vivax* hypnozoite activation patterns  
123 stratify with climate and geography [11] and recent modelling suggests transmission potential  
124 selects for hypnozoite phenotype [20]. Clearly the ability for *P. vivax* to dynamically regulate  
125 hypnozoite formation and relapse phenotypes in response to high or low transmission periods  
126 in different climate conditions would confer a significant evolutionary advantage.

127 Unfortunately, despite recent advances [21] current approaches for *in vitro* *P. vivax*  
128 culture do not support routine maintenance in the laboratory and tools to directly perturb gene  
129 function are not established. This renders studies on *P. vivax*, particularly its sporozoites and  
130 liver stages, exceedingly difficult. Although *in-vitro* liver stage assays and humanised mouse  
131 models are being developed [13], ‘omics analysis of *P. vivax* liver stage dormancy has until  
132 recently [22] been impossible and even now is in its early stages. Recent characterization [23]  
133 of liver-stage (hypnozoites and schizonts) of *P. cynomolgi* (a related and relapsing parasite in  
134 macaques) provides valuable insight, but further study of *P. vivax* directly is needed. The  
135 systems analysis of *P. vivax* sporozoites that reside in the mosquito salivary glands and are  
136 poised for transmission and liver infection offer a key opportunity to gain insight into *P. vivax*  
137 infection. To date, such characterization of *Plasmodium vivax* sporozoites is limited to  
138 microarray data [24], and epigenetic regulation in sporozoites has only been explored in *P.*  
139 *falciparum* [25, 26]. Here, we present a detailed characterization of the *P. vivax* sporozoite  
140 transcriptome and histone epigenome and use these data to better understand this key  
141 infective stage and the role of sporozoite programming in invasion and infection of the human  
142 host, and development within the host liver.

143  
144 **Fig. 1** *Transcriptional activity of the P. vivax sporozoite and evidence for translational*  
145 *repression. a* *Relative transcript abundance of key marker genes for sporozoites inferred by*  
146 *RNA-seq and qPCR (here) relative to previously published microarray data [24]; b* *Relative*  
147 *proportion of genes detectable as transcripts and proteins or transcripts only in RNA-seq and*  
148 *previously published proteomic data. Dashed line shows cut-off used in the current study for*  
149 *putatively repressed transcripts. Immunofluorescent staining of select proteins either known*  
150 *(UIS4) or predicted here (LISPI, EXP1 and ACP) to be translationally repressed in*  
151 *sporozoites in c sporozoite stages. CSP, mTIP as known positive controls and TRAP and BIP*  
152 *as experimental positive controls and d* *liver stages (schizonts) at 7 days post-infection in*  
153 *HuHep mice. Liver expression of EXP1 and ACP has been demonstrated by IFA in*  
154 *Mikolajczak et al [13], using the same antibodies as used here.*

## 155 **RESULTS AND DISCUSSION**

156 Mosquito infections were generated by membrane feeding of blood samples taken from *P.*  
157 *vivax* infected patients in western Thailand (n = 9). Approximately 3-15 million *P. vivax*  
158 sporozoites were harvested per isolate from *Anopheles dirus* salivary glands. Using RNA-seq,  
159 we detected transcription for 5,714 *P. vivax* genes (based on the *P. vivax* P01 gene models:  
160 [27]) and obtained a high degree of coverage (4,991 with a mean transcript per million (TPM)  
161 count  $\geq$  1.0) at a mean estimated abundance of 175.1 TPM (Figure S1 and Table S1 and S2).  
162 Among the most highly transcribed genes in the infectious sporozoite stage are *csp*  
163 (circumsporozoite protein), five *etramps* (early transcribed membrane proteins), including  
164 *uis3* (up-regulated in infective sporozoites), *uis4* and *lsap-1* (liver stage associated protein 1),  
165 a variety of genes involved in cell traversal and initiation of invasion, including *celtos* (cell  
166 traversal protein for ookinetes and sporozoites), *gest* (gamete egress and sporozoite traversal  
167 protein), *spect1* (sporozoite protein essential for cell traversal) and *siap-1* (sporozoite invasion  
168 protein).

169 associated protein), and genes associated with translational repression (*alba1*, *alba4* and  
170 *Puf2*). Collectively, these genes account for >1/3<sup>rd</sup> of all transcripts in the sporozoite. While  
171 we found only moderate agreement ( $R^2 = 0.35$ ; Figure S2) between our RNA-seq data and  
172 previous microarray data for *P. vivax* sporozoites and blood-stages [24], improved transcript  
173 detection and quantitation is expected with the increased technical resolution of RNA-seq  
174 over microarray. Supporting this, we find higher correlation between RNA-seq data from *P.*  
175 *vivax* and *P. falciparum* (single replicate sequenced herein for comparative purposes)  
176 sporozoite datasets ( $R^2 = 0.42$ ), compared to either species relative to published microarray  
177 data (Figure S2 and Table S3). Although microarray supports the high transcription in  
178 sporozoites of genes such as *uis4*, *csp*, *celtos* and several other *etramps*, 27% and 16% of the  
179 most abundant 1% of transcribed genes in our sporozoite RNA-seq data are absent from the  
180 top decile or quartile respectively in the existing *P. vivax* sporozoite microarray data [24].  
181 Among these are genes involved in early invasion/hepatocyte development, such as *lsap-1*,  
182 *celtos*, *gest* and *siap-1*, or translational repression (e.g., *alba-1* and *alba-4*); orthologs of these  
183 genes are also in the top percentile of transcripts in RNA-seq (see [25] and Table S4) and [28]  
184 and Table S5) and previous microarray data [29, 30] for human-infecting *P. falciparum* and  
185 murine-infecting *P. yoelii* sporozoites, suggesting many are indeed more abundant than  
186 previously characterized. A subset of representative transcripts, including a *Pv\_AP2*  
187 transcription factor (PVP01\_0733100), *d13*, *gest*, *g10* (PVP01\_1011100), 40S ribosomal  
188 protein S27 (PVP01\_1409300), *puf-2*, *zipco* and 14-3-3, were tested by qPCR for their  
189 transcript abundance relative to *celtos* and *sera* (Fig. 1A). This representative set differed  
190 markedly in their relative abundance between our RNAseq and previous microarray data [24].  
191 To control for batch effects introduced by collection of the sporozoites used here for RNAseq,  
192 this testing was conducted in an additional six sample replicates representing four additional  
193 clinical isolates *P. vivax* isolates (PvSPZ-Thai13-16; with PvSPZ-Thai16 tested in technical  
194 triplicate). The qPCR results overwhelmingly agreed with the RNAseq data for these  
195 transcripts.

196  
197 **Transcription in *P. vivax* relative to other plasmodia sporozoites.** To gain insight into  
198 species-specific aspects of the *P. vivax* transcriptome, we qualitatively compared these data  
199 with available data for *P. falciparum* [26] and *P. yoelii* sporozoites (single replicate only) for  
200 4,220 and 4,067 single-copy orthologs (SCO) (transcribed at  $\geq 1$  TPM in *P. vivax* infectious  
201 sporozoites) shared with *P. falciparum* (Table S4) and with both *P. falciparum* and *P. yoelii*  
202 (Table S5) respectively. Genes highly transcribed in salivary-gland sporozoites of all three  
203 species include *celtos*, *gest*, *trap*, *siap1*, *spect1* and *puf2*. There are 696 *P. vivax* genes shared  
204 as orthologs between *P. vivax* P01 and *P. vivax* Sal1 lacking a defined SCO in *P. falciparum*  
205 or *P. yoelii* transcribed at a mean of  $\geq 1$  TPM in *P. vivax* salivary-gland sporozoites (Table  
206 S6). Prominent among these are *vir* (n=25) and *Pv-fam* (41 fam-e, 16 fam-b, 14 fam-a, 8 fam-  
207 d and 3 fam-h) genes, as well as, hypothetical proteins or proteins of unknown function  
208 (n=212) and, interestingly, a number of ‘merozoite surface protein’ 3 and 7 homologs (n=5 of  
209 each). Both *msp3* and *msp7* have undergone significant expansion in *P. vivax* relative to *P.*  
210 *falciparum* and *P. yoelii* [31] and may have repurposed functions in sporozoites. In addition,  
211 there are 69 *P. vivax* P01 genes lacking a defined ortholog in *P. vivax* Sal1, *P. falciparum* or  
212 *P. yoelii* transcribed at  $\geq 1$  TPM in infectious *P. vivax* sporozoites; most of which are  
213 *Plasmodium* interspersed repeat (PIR) genes [31] found in telomeric regions of the P01  
214 assembly and likely absent from the Sal1 assembly but present in the Sal1 genome, indicating  
215 the improved coverage of telomeric regions in P01 relative to Sal1.

216  
217 ***P. vivax* sporozoites transcriptome compared with proteome.** We compared relative  
218 protein abundance presented in a recently published *P. vivax* sporozoite proteome [32] to  
219 relative transcript abundance from the current study (Fig. 1B, Table S7). The proteome study  
220 incorporated data from the same PvSPZ-Thai1 and PvSPZ-Thai5 isolates tested by RNAseq  
221 here. We identified 2,402 *P. vivax* genes transcribed in the sporozoite (CPM > 1) for which  
222 no protein expression was detected. Although many of these are lowly transcribed and likely



223 below the detection sensitivity of LC-MS proteomics, others are among the most highly  
224 transcribed genes in the sporozoite, indicating these may be under translational repression.

225 Translational repression, the mechanism through which transcripts are held in stasis  
226 by RNA binding proteins, has been demonstrated to have important functional roles in the  
227 transition of *Plasmodium* spp. from the vertebrate to invertebrate host and back again. More  
228 than 700 genes have been identified as being translationally repressed in *Plasmodium berghei*  
229 ('rodent malaria') gametocytes based on DOZI pulldowns [33]. Translational repression  
230 mechanisms mediated through Puf-2 have been explored in sporozoites of several  
231 *Plasmodium* species and regulates some of the most abundant transcripts in the sporozoite,  
232 such as *uis-3* and *uis-4*. UIS3 and UIS4 are the best characterized proteins under translational  
233 repression by Puf-2/SAP1 in sporozoites [34] and are essential for liver stage development  
234 [14].

235 In considering genes that may be translationally repressed in the *P. vivax* sporozoite,  
236 we confine our observations to those transcripts representing the top decile of transcript  
237 abundance to ensure their lack of detection as proteins was not due to limitations in the  
238 detection sensitivity of the proteomic dataset. Approximately 1/3<sup>rd</sup> of transcripts in the top  
239 decile of transcriptional abundance (n = 170 of 558) in *P. vivax* sporozoites were not  
240 detectable as peptides in multiple replicates (**Fig. 1B** and Table S7). Of these 170 putatively  
241 repressed transcripts, 156 and 154 have orthologs in *P. falciparum* and *P. yoelii* respectively,  
242 with 89 and 118 of these also not detected as proteins in *P. falciparum* and *P. yoelii* salivary-  
243 gland sporozoites [35] despite being transcribed in these stages (see [25, 28]; Tables S3-S5),  
244 and 133 (78.2%) having no detectable expression (>1 unique peptide count) in LC-MS data  
245 deposited for any species in PlasmoDB (Table S8). In contrast, 106 of the 170 putatively  
246 repressed transcripts with orthologs in other *Plasmodium* species (62.3%; Table S8) for which  
247 proteomic data is available in PlasmoDB, are detectable (>1 unique peptide count) by LC-MS  
248 methods in at least one other life-cycle stage. This indicates against a technical issue (e.g.,  
249 inability to be trypsin-digested) preventing their detection in the *P. vivax* sporozoite proteome  
250 [32]. In addition to *uis3* and *uis4*, genes involved in liver stage development and detectable as  
251 transcripts but not proteins in the *P. vivax* sporozoites include *lsap1* (liver stage associated  
252 protein 1), *zipco* (ZIP domain-containing protein), several other *etramps* (PVP01\_1271000,  
253 PVP01\_0422600, PVP01\_0504800 and PVP01\_0734800), *pvl* (parasitophorous vacuole  
254 protein 1) and *lisp1* and *lisp2* (PVP01\_1330800 and PVP01\_0304700). Also notable among  
255 genes detectable as transcripts but not proteins in sporozoites is a putative 'Yippee' homolog  
256 (PVP01\_0724100). Yippee is a DNA-binding protein that, in humans (YPEL3), suppresses  
257 cell growth [36] and is regulated through histone acetylation [37], making it noteworthy in the  
258 context of *P. vivax* hypnozoite developmental arrest.

259 Although verifying each putatively repressed transcript will require further empirical  
260 data, our system level approach is supported by immunofluorescent imaging (**Fig. 1C**) of  
261 UIS4, LISP1, EXP1 and ACP (PVP01\_0416300). These represent one known and three  
262 putative translationally repressed genes in *P. vivax* sporozoites, and are compared to TRAP  
263 and BiP (which are both transcribed and expressed as protein in the *P. vivax* sporozoite; Table  
264 S7). The *lisp1* gene is an interesting find. In *P. berghei*, *lisp1* is essential for rupture of the  
265 PVM during liver stage development allowing release of the merozoite into the host blood  
266 stream. *Pv-lisp1* is ~350-fold and ~1,350-fold more highly transcribed in *P. vivax* sporozoites  
267 compared to sporozoites of either *P. falciparum* or *P. yoelii* (see Table S5). IFAs using LISP1  
268 specific mAbs (**Fig. 1C**) show that this protein is undetectable in sporozoites but clearly  
269 expressed at 7 days post-infection in liver schizonts.

270  
271 **Up-regulated transcripts in *P. vivax* sporozoites relative to other life-cycle stages.**  
272 Recently completed studies of the transcriptome of *P. vivax* in the liver [22] and in blood-  
273 cells [38] support comparative transcriptomic study of sporozoites, their biology and  
274 transcriptional regulation over the *P. vivax* life-cycle. These data present an analytical  
275 challenge in that each (sporozoites, liver-stages and blood stages) is produced in a separate  
276 study and may be influenced by technical batch effects that cannot be differentiated from  
277 biologically meaningful changes. To address this, we first examined *P. vivax* transcripts in a

278 previous microarray study of multiple *P. vivax* life-cycle stages [24], including sporozoites  
279 and several blood-stages, to identify housekeeping genes that are transcriptionally stable  
280 across the life-cycle. We identified ~160 genes with low transcriptional variability across the  
281 *P. vivax* life-cycle, that covered the breadth of transcript abundance levels in Westenberger et  
282 al [24]. These genes include functions typically associated with housekeeping genes, such as  
283 ribosomal proteins, histones, translation initiation complex proteins and various chaperones  
284 (see Figure S3 and S4 and Table S8). We assessed transcription of these 160 ‘housekeeping’  
285 genes among the current and recently published RNA-seq data for *P. vivax* and all were of  
286 similarly low variability (Figure S6). This suggests that any batch effect between the studies  
287 is sufficiently lower than the biological differences between each life-cycle stage, allowing  
288 informative comparisons.

289  
290 ***P. vivax* sporozoite relative to blood-stage transcriptome.** To identify transcripts up-  
291 regulated in sporozoites, we first compared the *P. vivax* sporozoite transcriptome to RNA-seq  
292 data for *P. vivax* blood-stages [38] (Fig. 2 and Figures S5-S9). We identified 1,672 up (Table  
293 S9); Interactive Glimma Plot - Supplementary Data 1) and 1,958 down-regulated (Table S9);  
294 Interactive Glimma Plot - Supplementary Data 1) transcripts ( $FDR \leq 0.05$ ; minimum 2-fold  
295 change in Counts per Million (CPM)) and explored patterns among these differentially  
296 transcribed genes by protein family (Fig. 2C and Table S10) and Gene Ontology (GO)  
297 classifications (Table S11). RNA recognition motifs (RRM-1 and RRM-6) and helicase  
298 domains (Helicase-C and DEAD box helicases) are over-represented ( $p$ -value  $< 0.05$ ) among  
299 transcripts up-regulated in sporozoites, consistent with translational repression through  
300 ribonucleoprotein (RNP) granules [39]. Transcripts encoding nucleic acid binding domains,  
301 such as bromodomains (PF00439; which can also bind lysine-acetylated proteins), zinc  
302 fingers (PF13923) and EF hand domains (PF13499) are also enriched in sporozoites. Included  
303 among these proteins are a putative ApiAP2 transcription factor (PVP01\_1211900) and a  
304 homologue of the *Drosophila* zinc-binding protein ‘Yippee’ (PVP01\_0724100).  
305 Thrombospondin-1 like repeats (TSR: PF00090) and von Willebrand factor type A domains  
306 (PF00092) are enriched in sporozoites as well. In *P. falciparum* sporozoites, genes enriched in  
307 TSR domains are important in invasion of the mosquito salivary gland (e.g., *trap*) and  
308 secretory vesicles released by sporozoites upon entering the vertebrate host (e.g., *csp*) [40].  
309 By comparison, genes up-regulated in blood-stages are enriched for *vir* gene domains  
310 (PF09687 and PF05796), Tryptophan-Threonine-rich *Plasmodium* antigens (PF12319; which  
311 are associated with merozoites [41]), markers of cell-division (PF02493; [42]) protein  
312 production/degradation (PF00112, PF10584, PF00152, PF09688 and PF00227) and ATP  
313 metabolism (PF08238 and PF12774). 47 of the 343 transcripts unique to *P. vivax* sporozoites  
314 relative to *P. falciparum* or *P. yoelii* are up-regulated in sporozoites compared to *P. vivax*  
315 blood stages. Nine of these are in the top decile of transcription, and include a Pv-fam-e  
316 (PVP01\_0525200), a Pf-fam-b homolog (PVP01\_0602000) and 7 proteins of unknown  
317 function. A further nine have an ortholog in *P. cynomolgi* (which also forms hypnozoites) but  
318 not the closely related *P. knowlesi* (which does not form hypnozoites) and include ‘*msp7*’-like  
319 (PVP01\_1219600, PVP01\_1220300 and PVP01\_1219900), ‘*msp3*’-like (PVP01\_1031300),  
320 Pv-fam-e genes (PVP01\_0302100, PVP01\_0524500 and PVP01\_0523400), a serine-  
321 threonine protein kinase (PVP01\_0207300) and a RecQ1 helicase homolog  
322 (PVP01\_0717000). Notably, the *P. cynomolgi* ortholog of PVP01\_0207300, PCYB\_021650,  
323 is transcriptionally up-regulated in hypnozoites relative to replicating schizonts [23],  
324 indicating a target of significant interest when considering hypnozoite formation and/or  
325 biology and suggesting that our list here may contain other genes important in hypnozoite  
326 biology.

327  
328 **Fig. 2** Differential transcription between *Plasmodium vivax* salivary-gland sporozoites and  
329 blood-stages. **A** BCV plot showing separation between blood-stage (black) and salivary-  
330 gland sporozoite (red) biological replicates. **B** Volcano plot of distribution of fold-changes  
331 (FC) in transcription between blood-stages and salivary-gland sporozoites relative to  
332 statistical significance threshold (False Discovery Rate (FDR)  $\leq 0.05$ ). Positive FC

333 represents up-regulated transcription in the sporozoite stage. **C** Mirror plot showing pFam  
334 domains statistically significantly ( $FDR \leq 0.05$ ) over-represented in salivary-gland sporozoite  
335 up-regulated (red) or blood-stage up-regulated (black) transcripts. Scale bar truncated for  
336 presentation. \* - 55 PRESAN domains are in this dataset. \*\* - 99 Vir domains are in this  
337 dataset.

338  
339 **P. vivax sporozoites are enriched in translational repressors.** In *Plasmodium*, translational  
340 repression regulates key life-cycle transitions coinciding with switching between the  
341 mosquito and the mammalian host (either as sporozoites or gametocytes) [39]. For example,  
342 although *uis4* is the most abundant transcript in the infectious sporozoite ([24, 30]; Table S2),  
343 UIS4 is translationally repressed in this stage [15] and only expressed after hepatocyte  
344 invasion [43]. In sporozoites, it is thought that PUF2 binds to mRNA transcripts and prevents  
345 their translation [28], and SAP1 stabilises the repressed transcripts and prevents their  
346 degradation [43]. Consistent with this, *Puf2* and *SAP1* are among the more abundant *P. vivax*  
347 transcripts up-regulated in the sporozoite relative to blood-stages. Indeed, *Puf2* is among the  
348 top percentile of transcripts in infectious sporozoites and expressed at high levels in the  
349 proteome [32]. However, our data implicate other genes that may act in translational  
350 repression in *P. vivax* sporozoites, many of which are already known to be involved in  
351 translational repression in other *Plasmodium* stages and other protists [39]. Among these are  
352 *alba-2* and *alba-4*, both of which are among the top 2% of genes transcribed in sporozoites  
353 and ~14 to 20-fold more highly transcribed in sporozoites relative to blood-stages. In  
354 addition, *P. vivax* sporozoites are enriched for genes encoding RRM-6 RNA helicase  
355 domains. Intriguing among these are HoMu (homolog of Musashi) and ptbp (polypyrimidine  
356 tract binding protein). Musashi is a master regulator of eukaryotic stem cell differentiation  
357 through translational repression [44] and HoMu localizes with DOZI and CITH in  
358 *Plasmodium* gametocytes [45]. PTBP is linked to mRNA stability, splice regulation and  
359 translational initiation [46] and may perform a complementary role to SAP1.

360  
361 **Fig. 3** Differential transcription between *P. vivax* sporozoites (SPZ), mixed (mLS) and  
362 hypnozoite (HPZ) enriched liver stages (liver-stage data from Gural et al [22]). **A** Heatmap  
363 comparisons showing summed transcription of enriched Pfam domains in HPZ vs mLS (left),  
364 SPZ vs HPZ (top middle) and SPZ vs mLS (top right) comparisons. All Pfam domains  
365 statistically significantly enriched at  $p$ -value 0.05). All transcript data for stage up-regulated  
366 genes at  $FDR$  0.01). **B** Violin box-plot showing relative fold-change differences between SPZ  
367 and HPZ compared with SPZ and mLS for genes down-regulated in mLS compared to SPZ,  
368 but not down-regulated in HPZ compared to SPZ. **C** Ternary heatmap summarizing relative  
369 transcript abundance in each of SPZ, mLS and HPZ stages.

370  
371 **P. vivax sporozoite relative to Plasmodium spp. liver stage transcriptomes.** New advances in  
372 *P. vivax* in vitro liver stage culture has allowed recent publication of mixed liver-stage (mLS)  
373 and hypnozoite-enriched (HPZs) transcriptomes [22]. This is an early study and, due no doubt  
374 to the difficulty in generating the material, is limited to biological duplicates. Noting this,  
375 although we undertake differential transcriptomic studies of this dataset here, we recognize  
376 that additional biological replication is needed and have used a higher burden of significance  
377 ( $FDR \leq 0.01$  and  $\geq 2$ -fold change) than used with blood-stages. Nevertheless, these  
378 comparisons identified 1,015 and 856 sporozoite up-regulated transcripts relative to mLS and  
379 HPZs respectively and 1,007 and 1,079 transcripts up-regulated in mLS and HPZs relative to  
380 sporozoites respectively (**Fig. 3**; Figures S10-S12, Table S12 and S13 and Interactive Glimma  
381 Plot - Supplementary Data 1).

382 Compared to mLS transcriptomes, sporozoites are enriched for many of the  
383 transcripts similarly up-regulated in comparison to blood-stages (e.g., *uis4*, *celtos*, *puf2*, *siapl*  
384 and *plp-1*). More broadly, SPZ up-regulated transcripts over-represent ( $p$ -value  $\leq 0.05$ ) Pfam  
385 domains (**Fig. 3A**) associated with transcriptional regulation (PF00176, PF01096, PF01661  
386 and PF08711), translational repression/regulation (PF00076, PF00279, PF01008, PF01873,  
387 PF01917, PF02847, PF02854, PF13893 and PF14259), DNA/RNA binding (PF0097,

388 PF13445, PF13639, PF14570 and PF15247) and chromatin regulation (PF00271, PF00850  
389 and PF13489). In contrast, the mLS transcriptome is enriched in genes involved in replication  
390 and merozoite formation [n = 14; including PVP01\_0728900 (*mSP1*), PVP01\_0010670  
391 (*mSP3*) and PVP01\_1446800 (*mSP9*)], rhoptry function [n = 9; including PVP01\_1469200  
392 (*rmp3*), PVP01\_1255000 (*rmp2*) and PVP01\_1338500 (*rap1*)] and reticulocyte binding [n=10  
393 including PVP01\_0534300 (*rbp2c*), PVP01\_1402400 (*rbp2a*), PVP01\_0701100 (*rbp1b*) and  
394 PVP01\_0800700 (*rbp2b*)]. These data are further enriched for Pfam domains associated with  
395 cell division (PF00493), merozoite formation (PF07133 and PF12984), proteasome function  
396 (PF00227, PF00400, PF00656, PF01344, PF01398 and PF03981), protein export / vesicle  
397 function (PF00350 and PF00996), membrane proteins (PF01105, PF03011, PF05424 and  
398 PF12139) and metabolism (PF00085, PF00118, PF00268, PF01066, PF01214 and PF01214).  
399 Collectively, in addition to markers consistent with sporozoite or merozoite formation, these  
400 data point towards the sporozoite stage as being highly regulated and controlled at  
401 transcriptional, translational and chromatin levels, with the mLS representing a release of this  
402 control allowing replication, protein turn-over, reconfiguration of the proteins on the plasma  
403 membrane and metabolic activity.

404 Comparison of sporozoites with HPZs does not indicate a similar release of control,  
405 or at least that any release is more specific than for mLS. The sporozoite is enriched, relative  
406 to HPZs, in genes such as PVP\_1258000 (*gest*), PVP01\_0418000 (*sera*), PVP01\_1435400  
407 (*celtos*), PVP01\_0835600 (*csp*) and PVP01\_0602100 (*uis4*). At a broad level, sporozoite  
408 enriched Pfam domains include a smaller number associated with translational  
409 repression/regulation (PF00076) or DNA/RNA binding (PF01428 and PF12756).  
410 Interestingly, sporozoites are enriched in Pfam domains specifically associated with  
411 heterochromatin (H3K9me<sup>3</sup>) reading/interaction (PF02463, PF00628, PF13831 and  
412 PF13865). Ours (see below) and previous epigenetic studies of *Plasmodium* sporozoites [26]  
413 find dense heterochromatin in the telomeric to subtelomeric regions of the chromosome,  
414 which opens up and becomes transcriptionally active in blood-stages [47]. Others have noted  
415 an up-regulation of methyl/acetyltransferases in *P. cynomolgi* HPZs [23] and/or shown  
416 methyltransferase inhibitors stimulate hypnozoite activation *in vitro* [17]. The potential that  
417 histone epigenetics of sporozoites has a role in or changes with liver-stage development and  
418 the formation of liver schizonts or HPZs is intriguing but requires detailed study of the  
419 chromatin of liver-stage parasites, which is not presently available for *P. vivax*. In contrast,  
420 HPZs were enriched, relative to sporozoites, for genes including histone proteins  
421 (PVP01\_1138700, PVP01\_1131700 and PVP01\_0905900) and classic markers of metabolism  
422 (PVP01\_MITO3300 and PVP01\_MITO3400) and *lisp2*. Pfam data indicated, largely similar  
423 domain enrichment trends as were seen of the mLS relative to sporozoites, including a  
424 number of proteosomal (PF00227, PF00112, PF03981), vesicular transport (PF00996) and  
425 metabolic (PF00118, PF00268, PF01066, PF01214 a) associated functions. This supports  
426 HPZs being an arrested, rather than classically 'dormant', stage with active metabolism and  
427 protein turn-over. HPZs are also enriched for Pfams associated with mRNA/tRNA regulation  
428 and turnover (PF04857, PF01612, PF00009 and PF01138) and glycine metabolism (PF01571  
429 and PF00464) and acetyl-CoA production (PF02779 and PF00676).

430 Finally, although not the focus of this study, we looked at differential transcription  
431 between mLS and HPZ stages using the Gural et al [22] data, but using the same approaches  
432 as employed here. In particular, we were interested in what insight these comparisons might  
433 provide in terms of sporozoite differentiation or development into liver schizonts or HPZs.  
434 Among mLS up-regulated transcripts are genes associated with rhoptry function (n = 11;  
435 including PVP01\_0107500, PVP01\_1469200 and PVP01\_1469200), cytoadherence to red-  
436 cells (PVP01\_1401400 and PVP01\_0734500), merozoite formation (PVP01\_0728900 and  
437 PVP01\_0612400) and exported proteins (n = 6; including PVP01\_0504000, PVP01\_0119200  
438 and PVP01\_0801600). Consistent with *P. cynomolgi* [23], HPZ up-regulated transcripts  
439 include several key sporozoite transcripts, specifically *uis4* (PVP01\_0602100), *puf1*  
440 (PVP01\_1015000) and *speld* (PVP01\_0938800). At the Pfam domain level, mLS is enriched  
441 for metabolic (PF00317) and proteosomal (PF00112) domains also enriched in mLS or HPZs  
442 relative to sporozoites above, as well as domains associated with merozoite formation



443 (PF12948, PF07462), rhoptry function (PF0712), DNA/RNA binding (PF12756, PF10601  
444 and PF02151) and cell division, development and DNA replication (PF06705, PF00533,  
445 PF00488, PF02460, PF07034, PF02181). In contrast, HPZs are enriched in Pfam domains  
446 that overlap notably with key sporozoite markers, including *etramps* (PF09716) and *puf*  
447 proteins (PF00806), as well as domains associated with calcium metabolism (PF08683) and  
448 nucleotide metabolism (PF06437). These data largely indicate that the hypnozoite bears  
449 similarity both to the sporozoite and liver schizonts consistent with a stalled stage on the path  
450 to schizont development regulated by checkpoint signals that halt/restart normal schizont  
451 development, which has been proposed previously for this species [24].

452 With this in mind, we looked at transcripts that are differentially transcribed in mLS,  
453 but not HPZs, relative to SPZs. There are 107 transcripts down-regulated in mLS relative to  
454 SPZs that are transcribed at roughly similar levels in both SPZs and HPZs (**Fig 3B** and Table  
455 S14). A common theme among many of these genes are their role in transcriptional, post-  
456 transcriptional, translational or post-translational regulation. Among transcriptional regulators  
457 are transcription factors including AP2-SP2 (PVP01\_0303400) and three non-AP2-like  
458 transcription factors (PVP01\_0306600, PVP01\_0204300 and PVP01\_1415800). Post-  
459 transcriptional controllers include several DNA/RNA-binding proteins (PVP01\_1011000,  
460 PVP01\_0932900, PVP01\_0715300, PVP\_1242600 and PVP01\_0605200), RNA helicases  
461 (PVP01\_1403600 and PVP01\_1329800) and mRNA processing (PVP01\_1443100 and  
462 PVP01\_1458200) genes. Translational control includes several key regulators of translation  
463 initiation (PVP01\_1467700), tRNA processing (PVP01\_0318700 and PVP01\_1017700) or  
464 ribosomal function/biogenesis (PVP01\_1443700, PVP01\_0421400, PVP01\_1117200 and  
465 PVP01\_0215100). Post-translational control includes two methyltransferases  
466 (PVP01\_1428800 and PVP01\_1465200), including CARM1, which methylates of H3R17  
467 and, in mice, prevents differentiation in embryonic stem cells [48], and a putative histone  
468 methylation reading enzyme, EEML2 (PVP01\_1014100). The remaining genes in this group  
469 have three noteworthy and largely overlapping themes: (1) an association with calcium  
470 binding, metabolism or signalling, (2) a role in organellar metabolism and (3) homologs in  
471 other organisms, including a variety of prokaryotes and eukaryotes, with key roles in  
472 germination, dormancy and persistent non-replicating stages. The latter most function is  
473 clearly intriguing in the context of HPZ formation and activation. These genes include a  
474 homolog of dihydrolipoamide acyltransferase (aka 'sucB'), which is essential for growth in  
475 *Mycobacterium tuberculosis* [49] and a key regulator in persistent *Escherichia coli* stages  
476 [50]. Another key example is gamete fusion factor HAP2, which, despite the name, has been  
477 shown to regulate dormancy in eukaryotes ranging from plants [51, 52] to amoebae [53].

478 In addition to data for *P. vivax*, two transcriptomic studies are now available for *P.*  
479 *cynomolgi* [26, 54] that compare schizont stage parasites with small-form "hypnozoites". In  
480 comparing *P. cynomolgi* liver-stage RNA-seq and *P. vivax* liver-stage microarray data [24],  
481 Cubi et al [23] noted a moderate to good level of agreement ( $R^2 = 0.50$ ) as evidence of *P.*  
482 *cynomolgi* being predictive and representative of *P. vivax*. However, it should be noted also,  
483 that Voorberg van der Wel et al [54] explored congruence between their's and the Cubi et al  
484 [23] studies and found generally good agreement among schizonts and overall relatively poor  
485 agreement among hypnozoites from each study. This highlights the complexity of these  
486 datasets and indicates caution in comparing the current data to *P. vivax*. ApiAP2 transcription  
487 factors feature prominently in each liver-stage transcriptomic studies for *P. cynomolgi* [23,  
488 54] and *P. vivax* [22]. Cubi et al [23] noted an ApiAP2 (dubbed "AP2-Q"; PCYB\_102390) as  
489 transcriptionally up-regulated in *P. cynomolgi* hypnozoites and proposed this as a potential  
490 hypnozoite marker. We note that The *P. vivax* ortholog of *Pc*-AP2-Q (PVP01\_1016100) is  
491 among the genes detectable as a transcript but not protein in *P. vivax* sporozoites. This may  
492 point to a translationally repressed signal in sporozoites to regulate hypnozoite formation.  
493 However, as *Pv*-AP2-Q is transcribed at an abundance (~50 TPM) at or below which ~50% of  
494 *P. vivax* genes are detectable as transcripts but not as proteins (**Fig 1B**), this could as likely  
495 result from LC-MS detection sensitivity. Further, although AP2-Q was reported as absent  
496 from non-hypnozoite forming *Plasmodium* species [23], it is indeed found broadly across the  
497 genus, including among several non-hypnozoite producing *Plasmodium* species, such as *P.*

498 *knowlesi*, *P. gallinaceum* and *P. inui* [54]. Up-regulation of AP2-Q transcripts is not observed  
499 for hypnozoites in subsequent transcriptomic studies of *P. cynomolgi* [54] or *P. vivax* [22],  
500 nor do we see such an up-regulation here. Voorberg van der Wel et al [54] note transcription  
501 of a range of AP2s in *P. cynomolgi* liver stages, but do not find any to be up-regulated in  
502 hypnozoites. AP2s also feature among transcribed genes in *P. vivax* liver stages, with one,  
503 PVP01\_0916300, significantly up-regulated in hypnozoites. We note that PVP01\_0916300 is  
504 up-regulated in *P. vivax* sporozoites relative to blood-stages and found in the top quartile of  
505 transcripts by abundance (TPM = 104).

506  
507 **Chromatin epigenetics in *P. vivax* sporozoites.** As noted above, transcriptomic data for  
508 sporozoites, and their comparison with liver and blood-stages implicate histone epigenetics as  
509 having an important role in sporozoite biology and differentiation into liver stages. This  
510 concept has been alluded to also in recent liver-stage studies of *P. cynomolgi* [17, 23], which  
511 propose methyltransferases as having a potential role in hypnozoite formation. No epigenetic  
512 data are currently available for any *P. vivax* life-cycle stage. Studies of *P. falciparum* blood-  
513 stages have identified the importance of histone modifications as a primary epigenetic  
514 regulator [55, 56] and characterized key markers of heterochromatin (H3K9me<sup>3</sup>) and  
515 euchromatin/transcriptional activation (H3K4me<sup>3</sup> and H3K9ac). Recently, these marks have  
516 been explored with the maturation of *P. falciparum* sporozoites in the mosquito [25]. Here,  
517 we characterize major histone marks in *P. vivax* sporozoites and assess their relationship to  
518 transcript abundance.

519  
520 **Histone modifications in *P. vivax* sporozoites.** Using ChIP-seq, we identified 1,506, 1,999  
521 and 5,262 ChIP-seq peaks stably represented in multiple *P. vivax* sporozoite replicates and  
522 associated with H3K9me<sup>3</sup>, H3K9ac and H3K4me<sup>3</sup> histone marks respectively (**Figures 4** and  
523 S13). Peak width, spacing and stability differed with histone mark type (Figures S14 and  
524 S15). H3K4me<sup>3</sup> peaks were significantly broader (mean width: 1,985 bp) than H3K9 peaks,  
525 and covered the greatest breadth of the genome; 36.0% of all bases were stably associated  
526 with H3K4me<sup>3</sup> marks. This mark was also most stable among replicates, with just ~16% of  
527 bases associated with an H3K4me<sup>3</sup> not supported by more than one biological replicate. By  
528 comparison H3K9me<sup>3</sup> marks were narrowest (mean width: 796 bp) and least stable, with 46%  
529 of bases associated with this mark supported by just one replicate. Consistent with  
530 observations in *P. falciparum* H3K9me<sup>3</sup> ‘heterochromatin’ marks primarily clustered in  
531 telomeric and subtelomeric regions (**Figure 4**). In contrast, the ‘euchromatin’ /  
532 transcriptionally open histone marks, H3K4me<sup>3</sup> and H3K9ac, clustered around genic regions  
533 and did not overlap with regions under H3K9me<sup>3</sup> suppression. Both H3K9me<sup>3</sup> and H3K4me<sup>3</sup>  
534 marks were reasonably uniformly distributed (mean peak spacing ~500bp for each) within  
535 their respective regions of the genome. In contrast, H3K9ac peaks were spaced further apart  
536 (mean: ~2kb), but also with a greater variability in spacing (likely reflecting their association  
537 with promoter regions [57]). The instability of H3K9me<sup>3</sup> may reflect its use in *Plasmodium*  
538 for regulating variegated expression of contingency genes from multigene families whose  
539 members have overlapping and redundant functions [47] and confer phenotypic plasticity  
540 [58].

541  
542 **Fig. 4 Histone epigenetics relative to transcriptional behaviour in salivary-gland sporozoites.**  
543 **a** Representative H3K9me<sup>3</sup>, H3K4me<sup>3</sup> and H3K9ac ChIP-seq data (grey) from a  
544 representative chromosome (*P. vivax* P01 Chr5) relative to mRNA transcription in salivary-  
545 gland sporozoites (black) and blood-stages (black). Small numbers to top left of each row  
546 show data range. **b** Salivary-gland sporozoite transcription relative to nearest stable histone  
547 epigenetic marks. Numbers at the top of the figure represent total genes included in each  
548 category. Numbers within in box plot represent mean transcription in transcripts per million  
549 (TPM). **c** Sequence motifs enriched within 1kb upstream of the Transcription Start Site of  
550 highly transcribed (top 10%) relative to lowly transcribed genes associated with H3K9ac  
551 marks in salivary-gland sporozoites. **d** Relative transcription of (sub)telomeric genes in *P.*  
552 *vivax* salivary-gland sporozoites and blood-stages categorized by gene sets up-regulated in

553 blood-stages (blue), salivary sporozoites (red) or not stage enriched (grey). Numbers in each  
554 box show mean transcription in TPM.

555

556 **Genes under histone regulation.** We explored an association between these histone marks  
557 and the transcriptional behaviour of protein coding genes (Fig. 4 and Tables S15-S20). 485  
558 coding genes stably intersected with an H3K9me<sup>3</sup> mark; all are located near the ends of the  
559 chromosomal scaffolds (i.e., are (sub)telomeric). On average, these genes are transcribed at  
560 ~30 fold lower levels (mean 0.7 TPM) than genes not stably intersected by H3K9me<sup>3</sup> marks.  
561 These data clearly support the function of this mark in transcriptional silencing. This is  
562 largely consistent with observations in *P. falciparum* sporozoites [25]; Figure S16), however,  
563 we observe no genes within heterochromatin dense region that lacked a stably marked by  
564 H3K9me<sup>3</sup> signal or were transcribed at notable levels (i.e., above ~5 TPM). Whether this  
565 relates to differences in epigenetic control between the species is not clear. We note that  
566 (sub)telomeric genes are overall transcriptionally silent in *P. vivax* sporozoites relative to  
567 blood-stages (Fig. 4a and 4b and Tables S21 and S22). Consistent with observations in *P.*  
568 *falciparum* [55], the bulk of these genes include complex protein families, such as *vir* and *Pv-*  
569 *fam* genes, which function primarily in blood-stages. Also notable among the genes are  
570 several reticulocyte-binding proteins, including RBP2, 2a, 2b and 2c. This transcriptional  
571 silence in telomeric and subtelomeric regions was recently observed in *P. falciparum*  
572 sporozoites [26].

573

574 Outside of the telomeres and subtelomeres, H3K4me<sup>3</sup> marks are stably associated  
575 with the Transcription Start Site (TSS) and/or 5' UTRs of 3,677 genes. H3K9ac marks are  
576 also identified within 1kb of the TSS of 1,284 coding genes, with 179 of these stably marked  
577 also by H3K4me<sup>3</sup> (Figure S17). The average transcription of these genes is 50, 112 and 112  
578 TPMs respectively (72, 160 and 160-fold higher than H3K9me<sup>3</sup> marked genes). Gene-by-  
579 gene observations show that H3K9ac and H3K4me<sup>3</sup> marks cluster densely in the 1000kb up  
580 and down-stream of the start and stop codon respectively of transcribed genes, but are much  
581 less dense within coding regions of these genes (Figure S17). This pattern directly correlates  
582 with transcription and contrasts H3K9me<sup>3</sup> marks, which are distributed across the length of  
583 the gene at even density and are correlated with a lack of transcription. These data support the  
584 role of these marks in transcriptional activation, the lower abundance of H3K4me<sup>3</sup> marker,  
585 compared with H3K9ac or H3K9ac and H3K4me<sup>3</sup> marked genes suggest these marks work  
586 synergistically and that H3K9ac is possibly the better single mark indicator of transcriptional  
587 activity in *P. vivax*. This is consistent with recent observations in *P. falciparum* sporozoites  
588 [25].

588

589 Interestingly, H3K9ac-marked genes ranged in transcriptional activity from the most  
590 abundantly transcribed genes to many in the lower 50% and even lowest decile of  
591 transcription. This suggests more contributes to transcriptional activation in *P. vivax*  
592 sporozoites than, simply, gene accessibility through chromatin regulation. Specific activation  
593 by a transcription factor (e.g., ApiAP2s [59]) is the obvious candidate. To explore this, we  
594 compared upstream regions (within 1kb of the TSS or up to the 3' end of the next gene  
595 upstream, whichever was less) of highly (top 10%) and lowly (bottom 10%) transcribed  
596 H3K9ac marked genes for over-represented sequence motifs that might coincide with known  
597 ApiAP2 transcription factor binding sites [60]. We identified these based on the location of  
598 the nearest stable H3K9ac peak relative to the transcription start site for each gene (Figure  
599 S12). In most instances, these peaks were within 100bp of the TSS and, consistent with data  
600 from *P. falciparum* [57], *P. vivax* promoters appear to be no more than a few hundred to a  
601 maximum of 1000 bp upstream of the TSS. Exploring these regions, we identified two over-  
602 represented motifs: TGTACMA (e-value  $2.7e^{-5}$ ) and ATATTTH (e-value  $3.3e^{-3}$ ) (Fig. 2D).  
603 TGTAC is consistent with the known binding site for *Pf*-AP2-G, which regulates sexual  
604 differentiation in gametocytes [61], but its *P. vivax* ortholog (PVP01\_1418100) is neither  
605 highly transcribed nor expressed in sporozoites. ATATTTH is similar to the binding motif for  
606 *Pf*-AP2-L (AATTTCC), a transcription factor that is important for liver stage development in  
607 *P. berghei* [62]. In contrast to AP2-G, *Pv*-AP2-L (PVX\_081180) is in the top 10% of  
transcription and expression in *P. vivax* sporozoites and up-regulated relative to blood-stages.

608 In *P. vivax* sporozoites, the ATATTTH motif is associated with a number of highly  
609 transcribed genes, including *lisp1* and *uis2-4*, known to be regulated by AP2-L in *P. berghei*  
610 [62] as well as many of the most highly transcribed, H3K9ac marked genes, including two  
611 *etramps* (PVP01\_0734800 and PVP01\_0504800), several RNA-binding proteins, including  
612 *Puf2*, *ddx5*, a putative ATP-dependent RNA helicase DBP1 (PVP01\_1429700), and a putative  
613 *bax1* inhibitor (PVP01\_1465600). Interestingly, a number of highly transcribed and  
614 translationally repressed genes associated with the ATATTTH motif, including *uis4*, *siap2*  
615 and *pv1*, are not stably marked by H3K9ac in all replicates (i.e., there is significant variation  
616 in the placement of the H3K9ac peak or their presence/absence among replicates for these  
617 genes). It may be that additional histone modifications, for example H3K27me, H3R17me<sup>3</sup> or  
618 H2 or H4 modifications, are involved in regulating transcription of these genes. Certainly the  
619 H2A.Z modification, which is present in *P. falciparum*, and controls temperature responses in  
620 plants [63] is intriguing as a potential mark regulating sporozoite fate in *P. vivax* considering  
621 the association between hypnozoite activation rate and climate [11], as is H3R17me<sup>3</sup> in  
622 consideration of the enrichment of markers/readers of this modification in HPZs noted above  
623 and the role of this mark in cell fate progression in other species [48].

624  
625 **Fig. 5** Schematic of potential mechanisms underpinning development in differentiation of *P.*  
626 *vivax* sporozoites during liver-stage infection as hypnozoites and schizonts. We suggest  
627 differentiation programming at different points in development; first, schizont or hypnozoite  
628 fate possibly encoded in the sporozoite as epigenetic signals or translationally repressed  
629 transcripts; secondly, suppression signals that halt progression of the hypnozoite to schizont  
630 stage and support persistence; and finally activation signals signified by a release in  
631 chromatin, (post)transcriptional and (post)translational control leading to up-regulation of  
632 replication, metabolic and protein export pathways.  
633

## 634 CONCLUSIONS

635 We provide the first comprehensive study of the transcriptome and epigenome of mature  
636 *Plasmodium vivax* sporozoites and undertake detailed comparisons with recently published  
637 proteomic data for *P. vivax* sporozoites [32] and transcriptomic data for *P. vivax* mixed and  
638 hypnozoite-enriched liver-stages [22] and mixed blood-stages [38]. These data support the  
639 proposal that the sporozoite is a highly-programmed stage that is primed for invasion of and  
640 development in the host hepatocyte. Cellular regulation, including at transcription,  
641 translational and epigenetic levels, appears to play a major role in shaping this stage (which  
642 continues on in some form in hypnozoites), and many of the genes proposed here as being  
643 under translational repression are involved in hepatocyte infection and early liver-stage  
644 development (**Fig. 5**). We highlight a major role for RNA-binding proteins, including PUF2,  
645 ALBA2/4 and, intriguingly, ‘Homologue of Musashi’ (HoMu). We find that transcriptionally,  
646 the hypnozoite appears to be a transition point between the sporozoite and replicating  
647 schizonts, having many of the dominant sporozoite transcripts and retaining high transcription  
648 of a number of key regulatory pathways involved in transcription, translation and chromatin  
649 configuration (including histone arginine methylation). Our data support recent findings in  
650 other *Plasmodium* sporozoites and liver-stages for an important role in AP2 transcription  
651 factors, including AP2-SP2 and AP2-L. The data for AP2-Q, recently described as a marker  
652 for hypnozoites in *P. cynomolgi* [23, 54] is less clear and merits further study. A consistent  
653 theme in the study is the prominence of a number of genes that have a role in numerous  
654 eukaryotic systems in cell fate determination and differentiation (e.g., HoMu, Yippee and  
655 CARM1) and overlap with dormancy and/or persistent cell states in bacteria, protists or  
656 higher eukaryotes (e.g., bacterial *sucB* and gamete fusion protein HAP2). These data do not  
657 point to one single programming switch for dormancy or liver developmental fate in *P. vivax*  
658 but present a number of intriguing avenues for exploration in subsequent studies, particularly  
659 in model species such as *P. cynomolgi*. Our study provides a key foundation for  
660 understanding the early stages of hepatocyte infection and the developmental switch between  
661 liver trophozoite and hypnozoite formation. Importantly, it is a major first step in rationally  
662 prioritizing targets underpinning liver-stage differentiation for functional evaluation in



663 humanized mouse and simian models for relapsing *Plasmodium* species and identifying novel  
664 avenues to understand and eradicate liver-stage infections.

665

666 \

## 667 **MATERIALS AND METHODS**

668 **Ethics Statement.** Collection of venous blood from human patients with naturally acquired  
669 vivax infection for the current study was approved by the Ethical Review Committee of the  
670 Faculty of Tropical Medicine, Mahidol University (Human Subjects Protocol number TMEC  
671 11-033) with the informed written consent of each donor individual. All mouse tissue used in  
672 the current study was from preserved infected tissues generated previously [13]. All mouse  
673 infection work in [13] was carried out at the Centre for Infectious Diseases Research (CIDR)  
674 in Seattle, USA, under direct approval of the CIDR Institutional Animal Care and Use  
675 Committee (IACUC) and performed in strict accordance with the recommendations in the  
676 Guide for the Care and Use of Laboratory Animals of the National Institutes of Health, USA.  
677 The Centre for Infectious Disease Research Biomedical Research Institute has an Assurance  
678 from the Public Health Service (PHS Assurance number is A3640-01) through the Office of  
679 Laboratory Animal Welfare (OLAW) for work approved by its IACUC.

680

681 **Material collection, isolation and preparation.** Nine field isolates (PvSpz-Thai 1 to 9),  
682 representing symptomatic blood-stage malaria infections were collected as venous blood (20  
683 mL) from patients presenting at malaria clinics in Tak and Ubon Ratchatani provinces in  
684 Thailand. Each isolate was used to establish, infections in *Anopheles dirus* colonized at  
685 Mahidol University (Bangkok) by membrane feeding [13], after 14-16 days post blood  
686 feeding, ~3-15 million sporozoites were harvested per field isolate from the salivary glands of  
687 up to 1,000 of these mosquitoes as per [64] and shipped in preservative (trizol (RNA/DNA) or  
688 1% paraformaldehyde (DNA for ChIP-seq) to the Walter and Eliza Hall Institute (WEHI).

689

690 **Transcriptomics sequencing and differential analysis.** Upon arrival at WEHI, messenger  
691 RNAs were purified from an aliquot (~0.5-1 million sporozoites) of each *P. vivax* field isolate  
692 as per [38] and subjected to RNA-seq on Illumina NextSeq using TruSeq library construction  
693 chemistry as per the manufacturer's instructions. Raw reads for each RNA-seq replicate are  
694 available through the Sequence Read Archive (XXX-XXX). Sequencing adaptors were  
695 removed and low quality reads trimmed and filtered using Trimmomatic v. 0.36 [65]. To  
696 remove host contaminants, processed reads were aligned, as single-end reads, to the  
697 *Anopheles dirus* wrari2 genome (VectorBase version W1) using Bowtie2 [66] (--very-  
698 sensitive preset). All non-host reads were then aligned to the manually curated transcripts of  
699 the *P. vivax* P01 genome (<http://www.genedb.org/Homepage/PvivaxP01>; [27]) using RSEM  
700 [67] (pertinent settings: --bowtie2 --bowtie2-sensitivity-level very\_sensitive --calc-ci --ci-  
701 memory 10240 --estimate-rspd --paired-end). Transcript abundance for each gene in each  
702 replicate was calculated by RSEM as raw count, posterior mean estimate expected counts  
703 (pme-EC) and transcripts per million (TPM).

704

705 Transcriptional abundance in *P. vivax* sporozoites was compared qualitatively (by  
706 ranked abundance) with previously published microarray data for *P. vivax* salivary-gland  
707 sporozoites [24]. As a further quality control, these RNA-seq data were compared also with  
708 previously published microarray data for *P. falciparum* salivary-gland sporozoites [29], as  
709 well as RNA-seq data from salivary-gland sporozoites generated here for *P. falciparum*  
710 (single replicate generated from *P. falciparum* 3D7 lab cultures isolated from *Anopheles*  
711 *stephensi* and processed as above) and previously published for *P. yoelii* [28]. RNA-seq data  
712 from these additional *Plasmodium* species were (re)analysed from raw reads and  
713 transcriptional abundance for each species was determined (raw counts and pme-EC and TPM  
714 data) as described above using gene models current as of 04-10-2016 (PlasmoDB release  
715 v29). Interspecific transcriptional behaviour was qualitatively compared by relative ranked  
716 abundance in each species using TPM data for single copy orthologs (SCOs; defined in  
717 PlasmoDB) only, shared between *P. vivax* and *P. falciparum* or shared among *P. vivax*, *P.*  
*falciparum* and *P. yoelii*.

718 To define transcripts that were up-regulated in sporozoites, we remapped raw reads  
 719 representing early (18-24 hours post-infection (HPI)), mid (30-40 HPI) and late (42-46 HPI)  
 720 *P. vivax* blood-stage infections recently published by Zhu *et al* [38] to the *P. vivax* P01  
 721 transcripts using RSEM as above. All replicate data was assessed for mapping metrics,  
 722 transcript saturation and other standard QC metrics using QualiMap v 2.1.3 [68]. Differential  
 723 transcription between *P. vivax* salivary-gland sporozoites and mixed blood-stages [38] was  
 724 assessed using pme-EC data in EdgeR [69] and limma [70] (differential transcription cut-off:  
 725  $\geq 2$ -fold change in counts per million (CPM) and a False Discovery Rate (FDR)  $\leq 0.05$ ).  
 726 Pearson Chi squared tests were used to detect over-represented Pfam domains and Gene  
 727 Ontology (GO) terms among differentially transcribed genes in sporozoites (Bonferroni-  
 728 corrected  $p < 0.05$ ), based on gene annotations in PlasmoDB (release v29).

729 We also compared transcription of the sporozoite stages to recently published liver-  
 730 stage data from Gural *et al* (ref) as per the sporozoite to blood-stage comparisons above, with  
 731 the following modifications: (1) EC values were normalized using the ‘upper quartile’ method  
 732 instead of TMM, (2) differential transcription was assessed using a quasi-likelihood  
 733 generalized linear model (instead of a linear model) and (3) an FDR threshold for significance  
 734 of  $\leq 0.01$  was used instead of  $\leq 0.05$ . These differences related to specific attributes of the  
 735 liver-stage dataset, particularly the small number of replicates ( $n = 2$ ) per experiment  
 736 condition. Data visualization and interactive R-shiny plots were produced in R using the  
 737 ggplot[71], ggplot2 [72], gplots(heatmap.2) [73] and Glimma [74] packages.  
 738

739 **Assessment of Sporozoite RNA-seq transcriptome by selective RT-qPCR:** Extracted  
 740 RNA was DNase treated (Sigma D5307) as per manufacturer recommendations. RNA was  
 741 quantified using the TapeStation High Sensitivity RNA kit (Agilent). Two intron-spanning  
 742 primer pairs were designed per gene of interest using Primer3 and BLAST. Primer pairs were  
 743 tested in two concentrations (0.75ng and 2.83ng per reaction) to determine efficiency and  
 744 specificity. Product was run on a 1% agarose gel with ethidium bromide. Primer pairs  
 745 indicating non-specific priming were removed. The resulting 11 primer pairs were used on  
 746 four sporozoite samples; VUBR06, VUNL23, VUBR24, VTTY84. RNA was reverse  
 747 transcribed (Sensifast, Bionline) and used at 0.75ng per reaction, run on a Roche LightCycler  
 748 480 II. Melt curves were assessed and products were run on a gel to ensure specificity again.  
 749 Cp threshold was set automatically.  $\Delta$ Cp value was calculated as target gene – comparator  
 750 gene (SERA and CeTOS were used). Data were log transformed and fold change calculated.  
 751

752 RT-qPCR Primers were as follows:

| Name   | Gene        | Forward Primer            | Reverse Primer            |
|--------|-------------|---------------------------|---------------------------|
| RPS27  | PVX_122245  | ACCACCTTGTTTAGCCATGC      | TAATTTGCACTTCCACCCGTT     |
| D13    | PVX_089510  | CTGTACACGCACGAGCTGGC      | CAGCTCCTTGACGCCACTG       |
| G10    | PVX_080110  | ACGAGCTGTACTACAAGCGGA     | TTTCTCTGCACCAGGTAGTC      |
| AP2    | PVX_086995* | GCCCCACTGGAAGTTTTGGA      | CGTTCAGCCGCTGGTAGTAT      |
| SERA   | PVX_003790  | CTGAAGACCTCCAGGGACAAG     | TTTCTGCCTCTCCAGTGATATCTTT |
| CeTOS  | PVX_123510* | CCCCCAAAGGCCAAAATGAACAA   | CGCTCTTTCCCCTCAAGGAC      |
| GEST   | PVX_118040  | GACATATCAAGCAGTGAGGGA     | CATGTTGTGGCCTTTATATGCTG   |
| ALBA4  | PVX_083270  | TATCAACGGAGCCTTTGCCG      | GGACTTGATTCTCTCGTCGG      |
| PUF2   | PVX_089945  | ATCATAGAGAACGTCGACAAGCTTA | CTACGTTTCCAGGTTGCTGATC    |
| 14-3-3 | PVX_089505  | GACAACCTTGACCTGTGGACGTC   | TACTCGAGGCCTTCATCCTTCGATT |
| ZIPCO  | PVX_001980  | TTAGCTCAATTGCTTGTGGCTTTTT | TGCCACTAACTCCAAGGAAATAACT |

753  
 754  
 755

\* denotes single exon gene

756 **Salivary-gland sporozoite and liver-stage immunofluorescence assays (IFAs).** IFAs were  
757 performed as per [13] using preserved, vivax infected mouse liver tissue generated previously  
758 for that study. In [13], female FRG [fumarylacetoacetate hydrolase (F), recombination  
759 activation gene 2 (R), interleukin-2 receptor subunit gamma (G)] triple KO mice engrafted  
760 with human hepatocytes (FRG KO huHep) were purchased from Yecuris Corporation  
761 (Oregon, USA). Mice were infected through intravenous injection into the tail with  $3.5 \times$   
762  $10^5$  to  $1 \times 10^6$  sporozoites isolated from the salivary glands of infected mosquitoes in 100  $\mu$ l  
763 of RPMI media. Liver stages for the current study were obtained from 10 $\mu$ m formalin fixed  
764 paraffin embedded day 7 liver stages generated previously [13] from FRG knockout huHep  
765 mice; [13] these were deparaffinized prior to staining. Fresh salivary-gland sporozoites were  
766 fixed in acetone per [13]. All cells were incubated twice for 3 minutes in Xylene, then 100%  
767 Ethanol, and finally once for 3 minutes each in 95%, 70%, and 50% Ethanol. The cells were  
768 rinsed in DI water and permeabilized immediately in 1XTBS, containing Triton X-100 and  
769 30% hydrogen peroxide. The cells were blocked in 5% milk in 1XTBS. The hepatocytes were  
770 stained overnight with a rabbit polyclonal LISP1 antibody (A), a rabbit polyclonal UIS4  
771 antibody (B), and a rabbit polyclonal BIP antibody (C) in blocking buffer. The cells were  
772 washed with 1XTBS and the primary antibodies were detected with goat anti-rabbit Alexa  
773 Fluor 488 antibody (Life Technologies). The cells were washed in 1XTBS. The hepatocytes  
774 were rinsed in KMNO4 and washed in 1XTBS. The cells were incubated in DAPI for 5  
775 minutes.

776  
777 **Histone ChIP sequencing and analysis.** Aliquots of 2 – 6 million freshly isolated  
778 sporozoites were fixed with 1% paraformaldehyde for 10 min at 37°C and the reaction  
779 subsequently quenched by adding glycine to a final concentration of 125 mM. After three  
780 washes with PBS, sporozoite pellets were stored at -80°C and shipped to Australia. Nuclei  
781 were released from the sporozoites by dounce homogenization in lysis buffer (10 mM Hepes  
782 pH 7.9, 10 mM KCl, 0.1 mM EDTA, 0.1 mM EDTA, 1 mM DTT, 1x EDTA-free protease  
783 inhibitor cocktail (Roche), 0.25% NP40). Nuclei were pelleted by centrifugation at 21,000 g  
784 for 10 min at 4°C and resuspended in SDS lysis buffer (1% SDS, 10 mM EDTA, 50 mM Tris  
785 pH 8.1, 1x EDTA-free protease inhibitor cocktail). Chromatin was sheared into 200–1000 bp  
786 fragments by sonication for 16 cycles in 30 sec intervals (on/off, high setting) using a  
787 Bioruptor (Diagenode) and diluted 1:10 in ChIP dilution buffer (0.01% SDS, 1.1% Triton X-  
788 100, 1.2 mM EDTA, 16.7 mM Tris pH 8.1, 150 mM NaCl). Chromatin was precleared for 1  
789 hour with protein A/G sepharose (4FastFlow, GE Healthcare) equilibrated in 0.1% BSA  
790 (Sigma-Aldrich, USA) in ChIP dilution buffer. Chromatin from  $3 \times 10^5$  nuclei was taken  
791 aside as input material. Chromatin from approximately  $3 \times 10^6$  sporozoite nuclei was used for  
792 each ChIP. ChIP was carried out over night at 4°C with 5  $\mu$ g of antibody (H3K9me3 (Active  
793 Motif), H3K4me3 (Abcam), H3K9ac (Upstate), H4K16ac (Abcam)) and 10  $\mu$ l each of  
794 equilibrated protein A and G sepharose beads (4FastFlow, GE Healthcare). After washes in  
795 low-salt, high-salt, LiCl, and TE buffers (EZ-ChIP Kit, Millipore), precipitated complexes  
796 were eluted in 1% SDS, 0.1 M NaHCO<sub>3</sub>. Cross-linking of the immune complexes and input  
797 material was reversed for 6 hours at 45°C after addition of 500 mM NaCl and 20  $\mu$ g/ml of  
798 proteinase K (NEB). DNA was purified using the MinElute® PCR purification kit (Qiagen)  
799 and paired-end sequenced on Illumina NextSeq using TruSeq library construction chemistry  
800 as per the manufacturer's instructions. Raw reads for each ChIP-seq replicate are available  
801 through the Sequence Read Archive (XXX-XXX).

802 Fastq files were checked for quality using fastqc  
803 (<http://www.bioinformatics.babraham.ac.uk/projects/fastqc/>) and adapter sequences were  
804 trimmed using cutadapt [75]. Paired end reads were mapped to the *P. vivax* P01 strain  
805 genome annotation using Bowtie2 [66]. The alignment files were converted to Bam format,  
806 sorted and indexed using Samtools [76]. ChIP peaks were called relative to input using  
807 MACS2[77] in paired end mode with a q value less than or equal to 0.01. Peaks and peak  
808 summits were converted to sorted BED files. Bedtools intersect[78] was used to identify  
809 genes that intersected H3K9me3 peaks and Bedtools closest was used to identify genes that  
810 were closest to and downstream of H3K9ac and H3K4me3 peak summits.

811

812 **Sequence motif analysis.** Conserved sequence motifs were identified using the program  
813 DREME [79]. Only genes in the top decile of transcription showing no evidence of protein  
814 expression in multiple salivary-gland sporozoite replicates were considered as putatively  
815 translationally repressed (n = 170). We queried coding regions and regions upstream of the  
816 transcriptional start site (TSS) for each gene, defined by Zhu *et al* [38] and/or predicted here  
817 from all RNA-seq data using the Tuxedo suite [80], for enriched sequence motifs in  
818 comparison to 170 genes found to be in the top decile of both transcriptional and expressional  
819 abundance in the same sporozoite replicates. In searching for motifs associated with highly  
820 transcribed genes with stable H3K9ac marks within 1kb of the TSS (or up to the 3' end of the  
821 next gene upstream), we compared H3K9ac marked genes in the top decile of transcription to  
822 the same number of H3K9ac marked genes in the bottom decile of transcription. In both  
823 instances, an e-value threshold of 0.05 was considered the minimum threshold for statistical  
824 significance.

825

## 826 **References**

- 827 1. Organization WH. World Malaria Report 2015. WHO, Geneva. 2015.
- 828 2. Feachem RG, Phillips AA, Hwang J, Cotter C, Wielgosz B, Greenwood BM, et al.  
829 Shrinking the malaria map: progress and prospects. *Lancet*. 2010;376(9752):1566-78.  
830 doi: 10.1016/S0140-6736(10)61270-6.
- 831 3. Price RN, Douglas NM, Anstey NM. New developments in *Plasmodium vivax*  
832 malaria: severe disease and the rise of chloroquine resistance. *Curr Opin Infect Dis*.  
833 2009;22(5):430-5. doi: 10.1097/QCO.0b013e32832f14c1.
- 834 4. Baird KJ. Malaria caused by *Plasmodium vivax*: recurrent, difficult to treat,  
835 disabling, and threatening to life - averting the infectious bite preempts these hazards.  
836 *Pathogens and global health*. 2013;107:475-9.
- 837 5. Sattabongkot J, Tsuboi T, Zollner GE, Sirichaisinthop J, Cui L. *Plasmodium vivax*  
838 transmission: chances for control? *Trends Parasitol*. 2004;20(4):192-8.
- 839 6. Mueller I, Galinski MR, Baird JK, Carlton JM, Kochar DK, Alonso PL, et al. Key gaps  
840 in the knowledge of *Plasmodium vivax*, a neglected human malaria parasite. *Lancet*  
841 *Infect Dis*. 2009;9(9):555-66. doi: 10.1016/S1473-3099(09)70177-X.
- 842 7. Lindner SE, Miller JL, Kappe SH. Malaria parasite pre-erythrocytic infection:  
843 preparation meets opportunity. *Cell Microbiol*. 2012;14(3):316-24. doi: 10.1111/j.1462-  
844 5822.2011.01734.x.
- 845 8. Shin SC, Vanderberg JP, Terzakis JA. Direct infection of hepatocytes by  
846 sporozoites of *Plasmodium berghei*. *J Protozool*. 1982;29(3):448-54.
- 847 9. Mota MM, Pradel G, Vanderberg JP, Hafalla JC, Frevert U, Nussenzweig RS, et al.  
848 Migration of *Plasmodium* sporozoites through cells before infection. *Science*.  
849 2001;291(5501):141-4. doi: 10.1126/science.291.5501.141.
- 850 10. Lysenko AJ, Beljaev A, Rybalka V. Population studies of *Plasmodium vivax*: 1. The  
851 theory of polymorphism of sporozoites and epidemiological phenomena of tertian  
852 malaria. *Bulletin of the World Health Organization*. 1977;55(5):541.
- 853 11. White NJ. Determinants of relapse periodicity in *Plasmodium vivax* malaria.  
854 *Malar J*. 2011;10:297. doi: 10.1186/1475-2875-10-297.
- 855 12. Price RN, Tjitra E, Guerra CA, Yeung S, White NJ, Anstey NM. Vivax malaria:  
856 neglected and not benign. *Amer J Trop Med Hyg*. 2007;77(6 Suppl):79-87.
- 857 13. Mikolajczak SA, Vaughan AM, Kangwanransan N, Roobsoong W, Fishbaugher M,  
858 Yimamnuaichok N, et al. *Plasmodium vivax* liver stage development and hypnozoite  
859 persistence in human liver-chimeric mice. *Cell Host Microbe*. 2015;17(4):526-35. doi:  
860 10.1016/j.chom.2015.02.011.
- 861 14. Mueller A-K, Camargo N, Kaiser K, Andorfer C, Frevert U, Matuschewski K, et al.  
862 *Plasmodium* liver stage developmental arrest by depletion of a protein at the parasite-  
863 host interface. *Proc Natl Acad Sci USA*. 2005;102(8):3022-7.



- 864 15. Silvie O, Briquet S, Muller K, Manzoni G, Matuschewski K. Post-transcriptional  
865 silencing of UIS4 in *Plasmodium berghei* sporozoites is important for host switch. Mol  
866 Microbiol. 2014;91(6):1200-13. doi: 10.1111/mmi.12528.
- 867 16. Mackellar DC, O'Neill MT, Aly AS, Sacci JB, Jr., Cowman AF, Kappe SH.  
868 *Plasmodium falciparum* PF10\_0164 (ETRAMP10.3) is an essential parasitophorous  
869 vacuole and exported protein in blood stages. Eukaryot Cell. 2010;9(5):784-94. doi:  
870 10.1128/EC.00336-09.
- 871 17. Demele L, Franetich JF, Lorthois A, Gego A, Zeeman AM, Kocken CH, et al.  
872 Persistence and activation of malaria hypnozoites in long-term primary hepatocyte  
873 cultures. Nat Med. 2014;20(3):307-12. doi: 10.1038/nm.3461.
- 874 18. Malmquist NA, Moss TA, Mecheri S, Scherf A, Fuchter MJ. Small-molecule histone  
875 methyltransferase inhibitors display rapid antimalarial activity against all blood stage  
876 forms in *Plasmodium falciparum*. Proc Natl Acad Sci U S A. 2012;109(41):16708-13. doi:  
877 10.1073/pnas.1205414109.
- 878 19. Josling GA, Llinas M. Sexual development in Plasmodium parasites: knowing  
879 when it's time to commit. Nat Rev Microbiol. 2015;13(9):573-87. doi:  
880 10.1038/nrmicro3519.
- 881 20. White MT, Karl S, Battle KE, Hay SI, Mueller I, Ghani AC. Modelling the  
882 contribution of the hypnozoite reservoir to *Plasmodium vivax* transmission. Elife.  
883 2014;3. doi: 10.7554/eLife.04692.
- 884 21. Roobsoong W, Tharinjaroen CS, Rachaphaew N, Chobson P, Schofield L, Cui L, et  
885 al. Improvement of culture conditions for long-term in vitro culture of *Plasmodium vivax*.  
886 Malaria journal. 2015;14(1):1.
- 887 22. Gural N, Mancio-Silva L, Miller AB, Galstian A, Butty VL, Levine SS, et al. In vitro  
888 culture, drug sensitivity, and transcriptome of *Plasmodium vivax* hypnozoites. Cell Host  
889 Microbe. 2018;23(3):395-406 e4.
- 890 23. Cubi R, Vembar SS, Biton A, Franetich JF, Bordessoulles M, Sossau D, et al. Laser  
891 capture microdissection enables transcriptomic analysis of dividing and quiescent liver  
892 stages of *Plasmodium* relapsing species. Cell Microbiol. 2017. doi: 10.1111/cmi.12735.
- 893 24. Westenberger SJ, McClean CM, Chattopadhyay R, Dharia NV, Carlton JM,  
894 Barnwell JW, et al. A systems-based analysis of *Plasmodium vivax* lifecycle transcription  
895 from human to mosquito. PLoS Negl Trop Dis. 2010;4(4):e653. doi:  
896 10.1371/journal.pntd.0000653.
- 897 25. Gomez-Diaz E, Yerbanga RS, Lefevre T, Cohuet A, Rowley MJ, Ouedraogo JB, et al.  
898 Epigenetic regulation of *Plasmodium falciparum* clonally variant gene expression during  
899 development in *Anopheles gambiae*. Sci Rep. 2017;7:40655. doi: 10.1038/srep40655.
- 900 26. Zanghi G, Vembar SS, Baumgarten S, Ding S, Guizetti J, Bryant JM, et al. A specific  
901 PfEMP1 is expressed in *P. falciparum* sporozoites and plays a role in hepatocyte  
902 infection. Cell Rep. 2018;22(11):2951-63.
- 903 27. Auburn S, Bohme U, Steinbiss S, Trimarsanto H, Hostetler J, Sanders M, et al. A  
904 new *Plasmodium vivax* reference sequence with improved assembly of the  
905 subtelomeres reveals an abundance of pir genes. Wellcome Open Res. 2016;1:4. Epub  
906 2016/12/23. doi: 10.12688/wellcomeopenres.9876.1.
- 907 28. Lindner SE, Mikolajczak SA, Vaughan AM, Moon W, Joyce BR, Sullivan WJ, Jr., et  
908 al. Perturbations of *Plasmodium* Puf2 expression and RNA-seq of Puf2-deficient  
909 sporozoites reveal a critical role in maintaining RNA homeostasis and parasite  
910 transmissibility. Cell Microbiol. 2013;15(7):1266-83. doi: 10.1111/cmi.12116.
- 911 29. Le Roch KG, Johnson JR, Florens L, Zhou Y, Santrosyan A, Grainger M, et al. Global  
912 analysis of transcript and protein levels across the *Plasmodium falciparum* life cycle.  
913 Genome research. 2004;14(11):2308-18.
- 914 30. Mikolajczak SA, Silva-Rivera H, Peng X, Tarun AS, Camargo N, Jacobs-Lorena V, et  
915 al. Distinct malaria parasite sporozoites reveal transcriptional changes that cause  
916 differential tissue infection competence in the mosquito vector and mammalian host.  
917 Molecular and cellular biology. 2008;28(20):6196-207.

- 918 31. Carlton JM, Adams JH, Silva JC, Bidwell SL, Lorenzi H, Caler E, et al. Comparative  
919 genomics of the neglected human malaria parasite *Plasmodium vivax*. *Nature*.  
920 2008;455(7214):757-63. doi: 10.1038/nature07327.
- 921 32. Swearingen KE, Lindner SE, Flannery EL, Vaughan AM, Morrison RD,  
922 Patrapuvich R, et al. Proteogenomic analysis of the total and surface-exposed proteomes  
923 of *Plasmodium vivax* salivary gland sporozoites. *PLoS Negl Trop Dis*.  
924 2017;11(7):e0005791. Epub 2017/08/02. doi: 10.1371/journal.pntd.0005791.
- 925 33. Guerreiro A, Deligianni E, Santos JM, Silva PA, Louis C, Pain A, et al. Genome-wide  
926 RIP-Chip analysis of translational repressor-bound mRNAs in the *Plasmodium*  
927 gametocyte. *Genome Biol*. 2014;15(11):493. doi: 10.1186/s13059-014-0493-0.
- 928 34. Silvie O, Briquet S, Müller K, Manzoni G, Matuschewski K. Post-transcriptional  
929 silencing of UIS4 in *Plasmodium berghei* sporozoites is important for host switch.  
930 *Molecular microbiology*. 2014;91(6):1200-13.
- 931 35. Lindner SE, Swearingen KE, Harupa A, Vaughan AM, Sinnis P, Moritz RL, et al.  
932 Total and putative surface proteomics of malaria parasite salivary gland sporozoites.  
933 *Mol Cell Proteomics*. 2013;12(5):1127-43. doi: 10.1074/mcp.M112.024505.
- 934 36. Kelley KD, Miller KR, Todd A, Kelley AR, Tuttle R, Berberich SJ. YPEL3, a p53-  
935 regulated gene that induces cellular senescence. *Cancer Res*. 2010;70(9):3566-75. doi:  
936 10.1158/0008-5472.CAN-09-3219.
- 937 37. Tuttle R, Simon M, Hitch DC, Maiorano JN, Hellan M, Ouellette J, et al. Senescence-  
938 associated gene YPEL3 is downregulated in human colon tumors. *Ann Surg Oncol*.  
939 2011;18(6):1791-6. doi: 10.1245/s10434-011-1558-x.
- 940 38. Zhu L, Mok S, Imwong M, Jaidee A, Russell B, Nosten F, et al. New insights into  
941 the *Plasmodium vivax* transcriptome using RNA-Seq. *Sci Rep*. 2016;6:20498. doi:  
942 10.1038/srep20498.
- 943 39. Kramer S. RNA in development: how ribonucleoprotein granules regulate the life  
944 cycles of pathogenic protozoa. *WIR: RNA*. 2014;5(2):263-84.
- 945 40. Tucker RP. The thrombospondin type 1 repeat superfamily. *Int J Biochem Cell*  
946 *Biol*. 2004;36(6):969-74. doi: 10.1016/j.biocel.2003.12.011.
- 947 41. Ntumngia FB, Bouyou-Akotet MK, Uhlemann AC, Mordmuller B, Kreamsner PG,  
948 Kun JF. Characterisation of a tryptophan-rich *Plasmodium falciparum* antigen associated  
949 with merozoites. *Mol Biochem Parasitol*. 2004;137(2):349-53. doi:  
950 10.1016/j.molbiopara.2004.06.008.
- 951 42. Gubbels MJ, Vaishnav S, Boot N, Dubremetz JF, Striepen B. A MORN-repeat  
952 protein is a dynamic component of the *Toxoplasma gondii* cell division apparatus. *J Cell*  
953 *Sci*. 2006;119(Pt 11):2236-45. doi: 10.1242/jcs.02949.
- 954 43. Aly AS, Lindner SE, MacKellar DC, Peng X, Kappe SH. SAP1 is a critical post-  
955 transcriptional regulator of infectivity in malaria parasite sporozoite stages. *Mol*  
956 *Microbiol*. 2011;79(4):929-39. doi: 10.1111/j.1365-2958.2010.07497.x.
- 957 44. Okano H, Imai T, Okabe M. Musashi: a translational regulator of cell fate. *Journal*  
958 *of Cell Science*. 2002;115(7):1355-9.
- 959 45. Cui L, Lindner S, Miao J. Translational regulation during stage transitions in  
960 malaria parasites. *Annals N Y Acad Sci*. 2015;1342(1):1-9.
- 961 46. Lasko P. Gene regulation at the RNA layer: RNA binding proteins in intercellular  
962 signaling networks. *Sci STKE*. 2003;179:RE6.
- 963 47. Guizetti J, Scherf A. Silence, activate, poise and switch! Mechanisms of antigenic  
964 variation in *Plasmodium falciparum*. *Cell microbiol*. 2013;15(5):718-26.
- 965 48. Wu Q, Bruce AW, Jedrusik A, Ellis PD, Andrews RM, Langford CF, et al. CARM1 is  
966 required in embryonic stem cells to maintain pluripotency and resist differentiation.  
967 *Stem Cells*. 2009;27(11):2637-45. Epub 2009/06/23. doi: 10.1002/stem.131.
- 968 49. Shi S, Ehrt S. Dihydrolipoamide acyltransferase is critical for *Mycobacterium*  
969 *tuberculosis* pathogenesis. *Infect Immun*. 2006;74(1):56-63. Epub 2005/12/22. doi:  
970 10.1128/IAI.74.1.56-63.2006.

- 971 50. Ma C, Sim S, Shi W, Du L, Xing D, Zhang Y. Energy production genes *sucB* and  
972 *ubiF* are involved in persister survival and tolerance to multiple antibiotics and stresses  
973 in *Escherichia coli*. *FEMS Microbiol Lett.* 2010;303(1):33-40. Epub 2010/01/01. doi:  
974 10.1111/j.1574-6968.2009.01857.x.
- 975 51. Schrader J, Moyle R, Bhalerao R, Hertzberg M, Lundeborg J, Nilsson P, et al.  
976 Cambial meristem dormancy in trees involves extensive remodelling of the  
977 transcriptome. *Plant J.* 2004;40(2):173-87. Epub 2004/09/28. doi: 10.1111/j.1365-  
978 313X.2004.02199.x.
- 979 52. Yazawa K, Kamada H. Identification and characterization of carrot HAP factors  
980 that form a complex with the embryo-specific transcription factor C-LEC1. *J Exp Bot.*  
981 2007;58(13):3819-28. Epub 2007/12/07. doi: 10.1093/jxb/erm238.
- 982 53. Wood FC, Heidari A, Tekle YI. Genetic Evidence for Sexuality in *Cochliopodium*  
983 (Amoebozoa). *J Hered.* 2017;108(7):769-79. Epub 2017/10/17. doi:  
984 10.1093/jhered/esx078.
- 985 54. Voorberg-van der Wel A, Roma G, Gupta DK, Schuierer S, Nigsch F, Carbone W, et  
986 al. A comparative transcriptomic analysis of replicating and dormant liver stages of the  
987 relapsing malaria parasite *Plasmodium cynomolgi*. *Elife.* 2017;6. Epub 2017/12/08. doi:  
988 10.7554/eLife.29605.
- 989 55. Lopez-Rubio J-J, Mancio-Silva L, Scherf A. Genome-wide analysis of  
990 heterochromatin associates clonally variant gene regulation with perinuclear repressive  
991 centers in malaria parasites. *Cell host & microbe.* 2009;5(2):179-90.
- 992 56. Duffy MF, Selvarajah SA, Josling GA, Petter M. Epigenetic regulation of the  
993 *Plasmodium falciparum* genome. *Brief Funct Genomics.* 2014;13(3):203-16. doi:  
994 10.1093/bfgp/elt047.
- 995 57. Cui L, Miao J, Furuya T, Li X, Su XZ, Cui L. PfGCN5-mediated histone H3  
996 acetylation plays a key role in gene expression in *Plasmodium falciparum*. *Eukaryot Cell.*  
997 2007;6(7):1219-27. doi: 10.1128/EC.00062-07.
- 998 58. Rovira-Graells N, Gupta AP, Planet E, Crowley VM, Mok S, de Pouplana LR, et al.  
999 Transcriptional variation in the malaria parasite *Plasmodium falciparum*. *Genome*  
1000 *research.* 2012;22(5):925-38.
- 1001 59. De Silva EK, Gehrke AR, Olszewski K, León I, Chahal JS, Bulyk ML, et al. Specific  
1002 DNA-binding by apicomplexan AP2 transcription factors. *Proc Natl Acad Sci.*  
1003 2008;105(24):8393-8.
- 1004 60. Painter HJ, Campbell TL, Llinás M. The Apicomplexan AP2 family: integral factors  
1005 regulating *Plasmodium* development. *Molecular and biochemical parasitology.*  
1006 2011;176(1):1-7.
- 1007 61. Kafsack BF, Rovira-Graells N, Clark TG, Bancells C, Crowley VM, Campino SG, et  
1008 al. A transcriptional switch underlies commitment to sexual development in human  
1009 malaria parasites. *Nature.* 2014;507(7491):248.
- 1010 62. Iwanaga S, Kaneko I, Kato T, Yuda M. Identification of an AP2-family protein that  
1011 is critical for malaria liver stage development. *PLoS One.* 2012;7(11):e47557.
- 1012 63. Boden SA, Kavanova M, Finnegan EJ, Wigge PA. Thermal stress effects on grain  
1013 yield in *Brachypodium distachyon* occur via H2A.Z-nucleosomes. *Genome Biol.*  
1014 2013;14(6):R65. doi: 10.1186/gb-2013-14-6-r65.
- 1015 64. Kennedy M, Fishbaugher ME, Vaughan AM, Patrapuvich R, Boonhok R,  
1016 Yimamnuaychok N, et al. A rapid and scalable density gradient purification method for  
1017 *Plasmodium* sporozoites. *Malar J.* 2012;11:421. doi: 10.1186/1475-2875-11-421.
- 1018 65. Bolger AM, Lohse M, Usadel B. Trimmomatic: a flexible trimmer for Illumina  
1019 sequence data. *Bioinformatics.* 2014;30(15):2114-20. doi:  
1020 10.1093/bioinformatics/btu170.
- 1021 66. Langmead B, Salzberg SL. Fast gapped-read alignment with Bowtie 2. *Nat*  
1022 *Methods.* 2012;9(4):357-9. doi: 10.1038/nmeth.1923.
- 1023 67. Li B, Dewey CN. RSEM: accurate transcript quantification from RNA-Seq data  
1024 with or without a reference genome. *BMC Bioinformatics.* 2011;12(1):323.

- 1025 68. Okonechnikov K, Conesa A, Garcia-Alcalde F. Qualimap 2: advanced multi-  
1026 sample quality control for high-throughput sequencing data. *Bioinformatics*.  
1027 2016;32(2):292-4. doi: 10.1093/bioinformatics/btv566.
- 1028 69. Nikolayeva O, Robinson MD. edgeR for differential RNA-seq and ChIP-seq  
1029 analysis: an application to stem cell biology. *Methods Mol Biol*. 2014;1150:45-79. doi:  
1030 10.1007/978-1-4939-0512-6\_3.
- 1031 70. Ritchie ME, Phipson B, Wu D, Hu Y, Law CW, Shi W, et al. limma powers  
1032 differential expression analyses for RNA-sequencing and microarray studies. *Nucleic  
1033 acids research*. 2015;43(7):e47-e.
- 1034 71. Wickham H. ggplot: An implementation of the Grammar of Graphics in R, 2006. R  
1035 package version 04 0.
- 1036 72. Wickham H, Chang W. ggplot2: An implementation of the Grammar of Graphics.  
1037 R package version 07, URL: <http://CRAN.R-project.org/package=ggplot2>. 2008.
- 1038 73. Warnes GR, Bolker B, Bonebakker L, Gentleman R, Huber W, Liaw A, et al. gplots:  
1039 Various R programming tools for plotting data. R package version. 2009;2(4):1.
- 1040 74. Law CW, Alhamdoosh M, Su S, Smyth GK, Ritchie ME. RNA-seq analysis is easy as  
1041 1-2-3 with limma, Glimma and edgeR. *F1000Research*. 2016;5.
- 1042 75. Martin M. Cutadapt removes adapter sequences from high-throughput  
1043 sequencing reads. *EMBnet journal*. 2011;17(1):pp. 10-2.
- 1044 76. Li H, Handsaker B, Wysoker A, Fennell T, Ruan J, Homer N, et al. The Sequence  
1045 Alignment/Map format and SAMtools. *Bioinformatics*. 2009;25(16):2078-9. doi:  
1046 10.1093/bioinformatics/btp352.
- 1047 77. Zhang Y, Liu T, Meyer CA, Eeckhoute J, Johnson DS, Bernstein BE, et al. Model-  
1048 based analysis of ChIP-Seq (MACS). *Genome Biol*. 2008;9(9):R137. doi: 10.1186/gb-  
1049 2008-9-9-r137.
- 1050 78. Quinlan AR, Hall IM. BEDTools: a flexible suite of utilities for comparing genomic  
1051 features. *Bioinformatics*. 2010;26(6):841-2. doi: 10.1093/bioinformatics/btq033.
- 1052 79. Bailey TL. DREME: motif discovery in transcription factor ChIP-seq data.  
1053 *Bioinformatics*. 2011;27(12):1653-9.
- 1054 80. Trapnell C, Roberts A, Goff L, Pertea G, Kim D, Kelley DR, et al. Differential gene  
1055 and transcript expression analysis of RNA-seq experiments with TopHat and Cufflinks.  
1056 *Nat Protoc*. 2012;7(3):562-78. doi: 10.1038/nprot.2012.016.
- 1057



**A**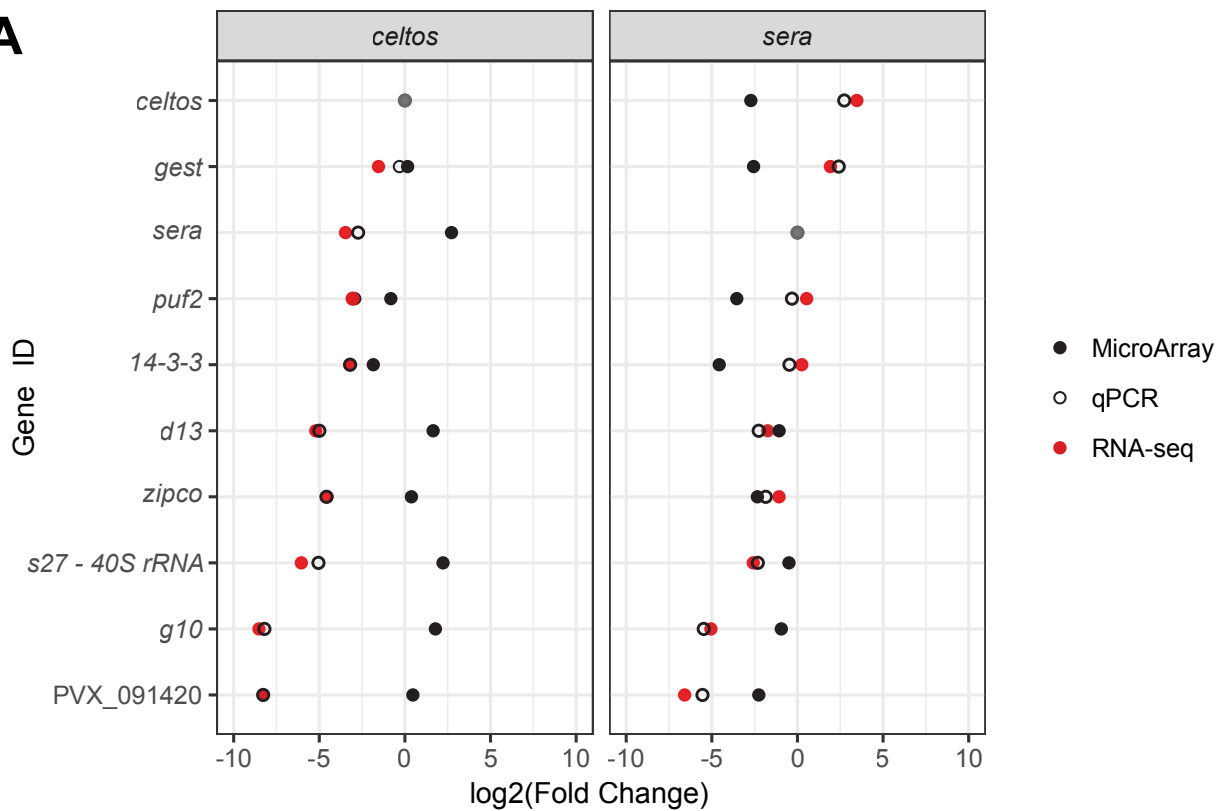**B**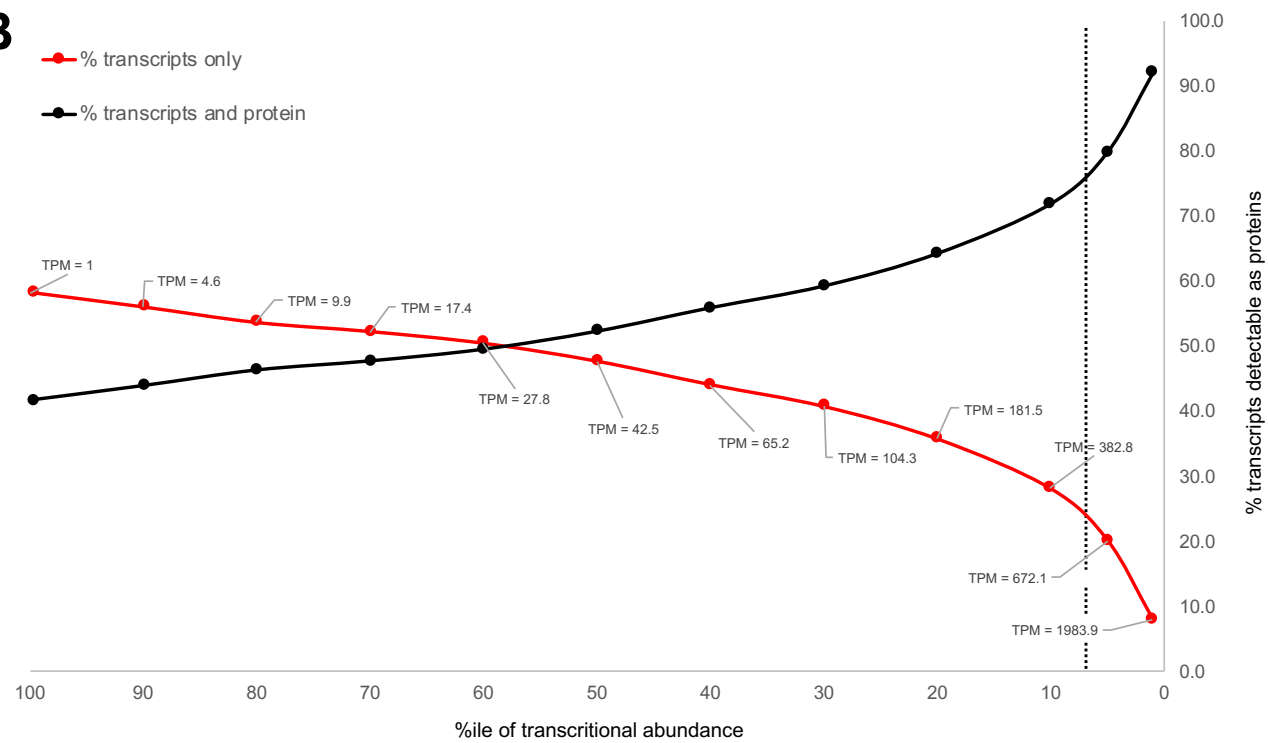**C**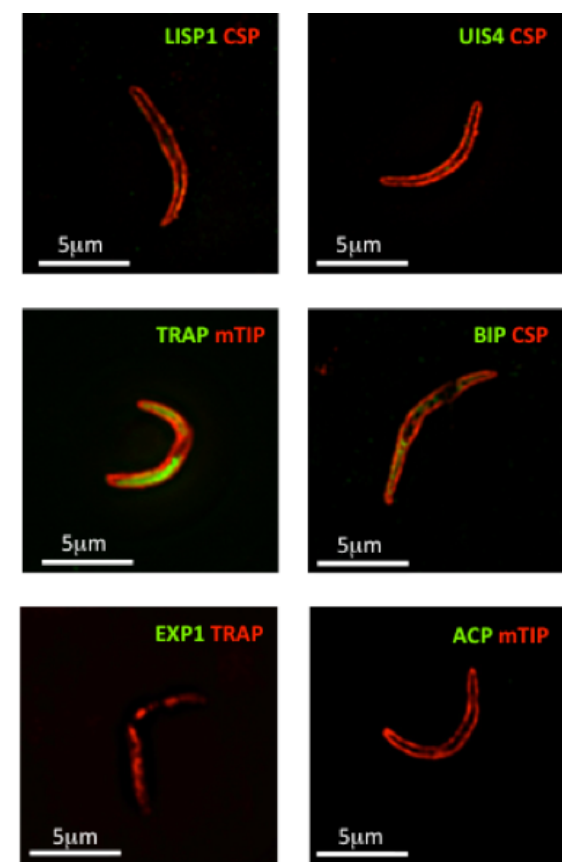**D**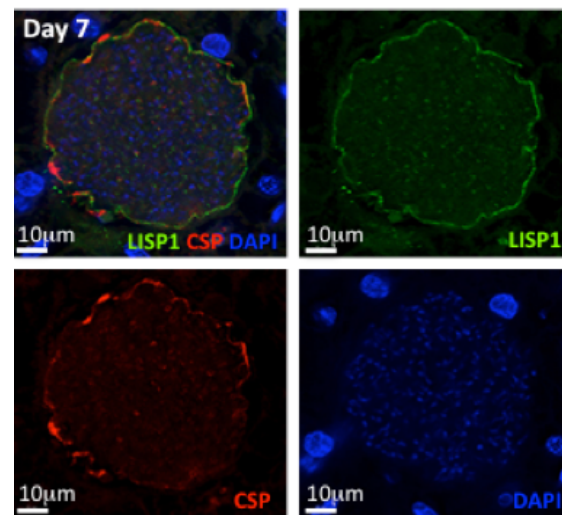

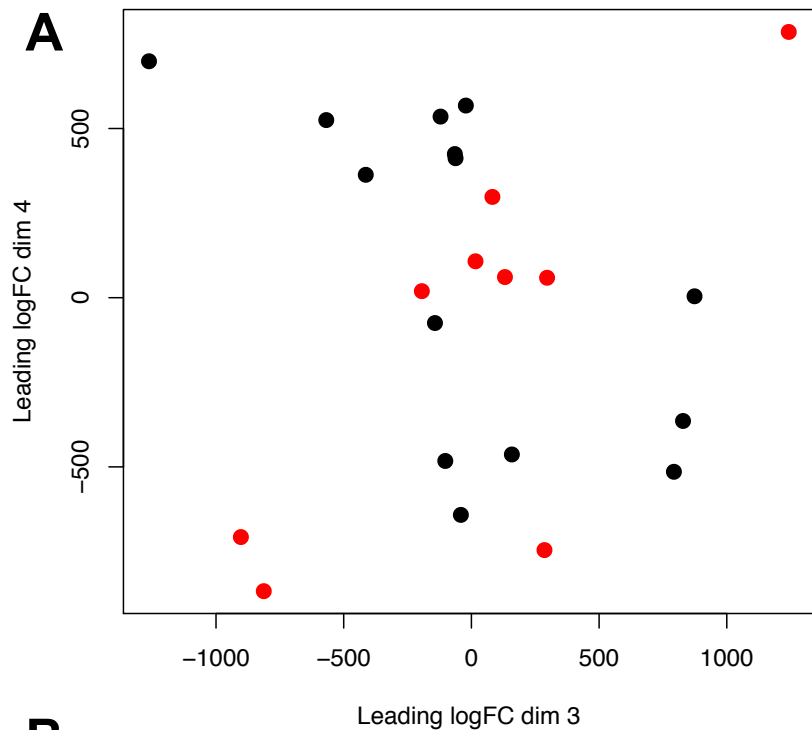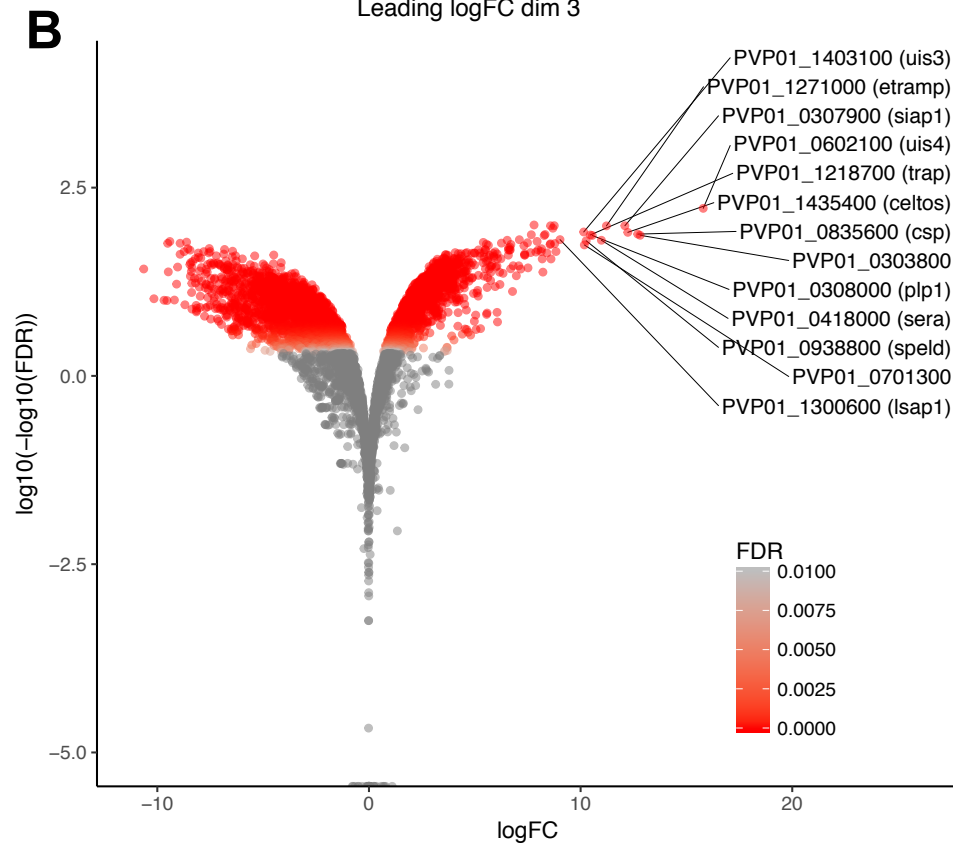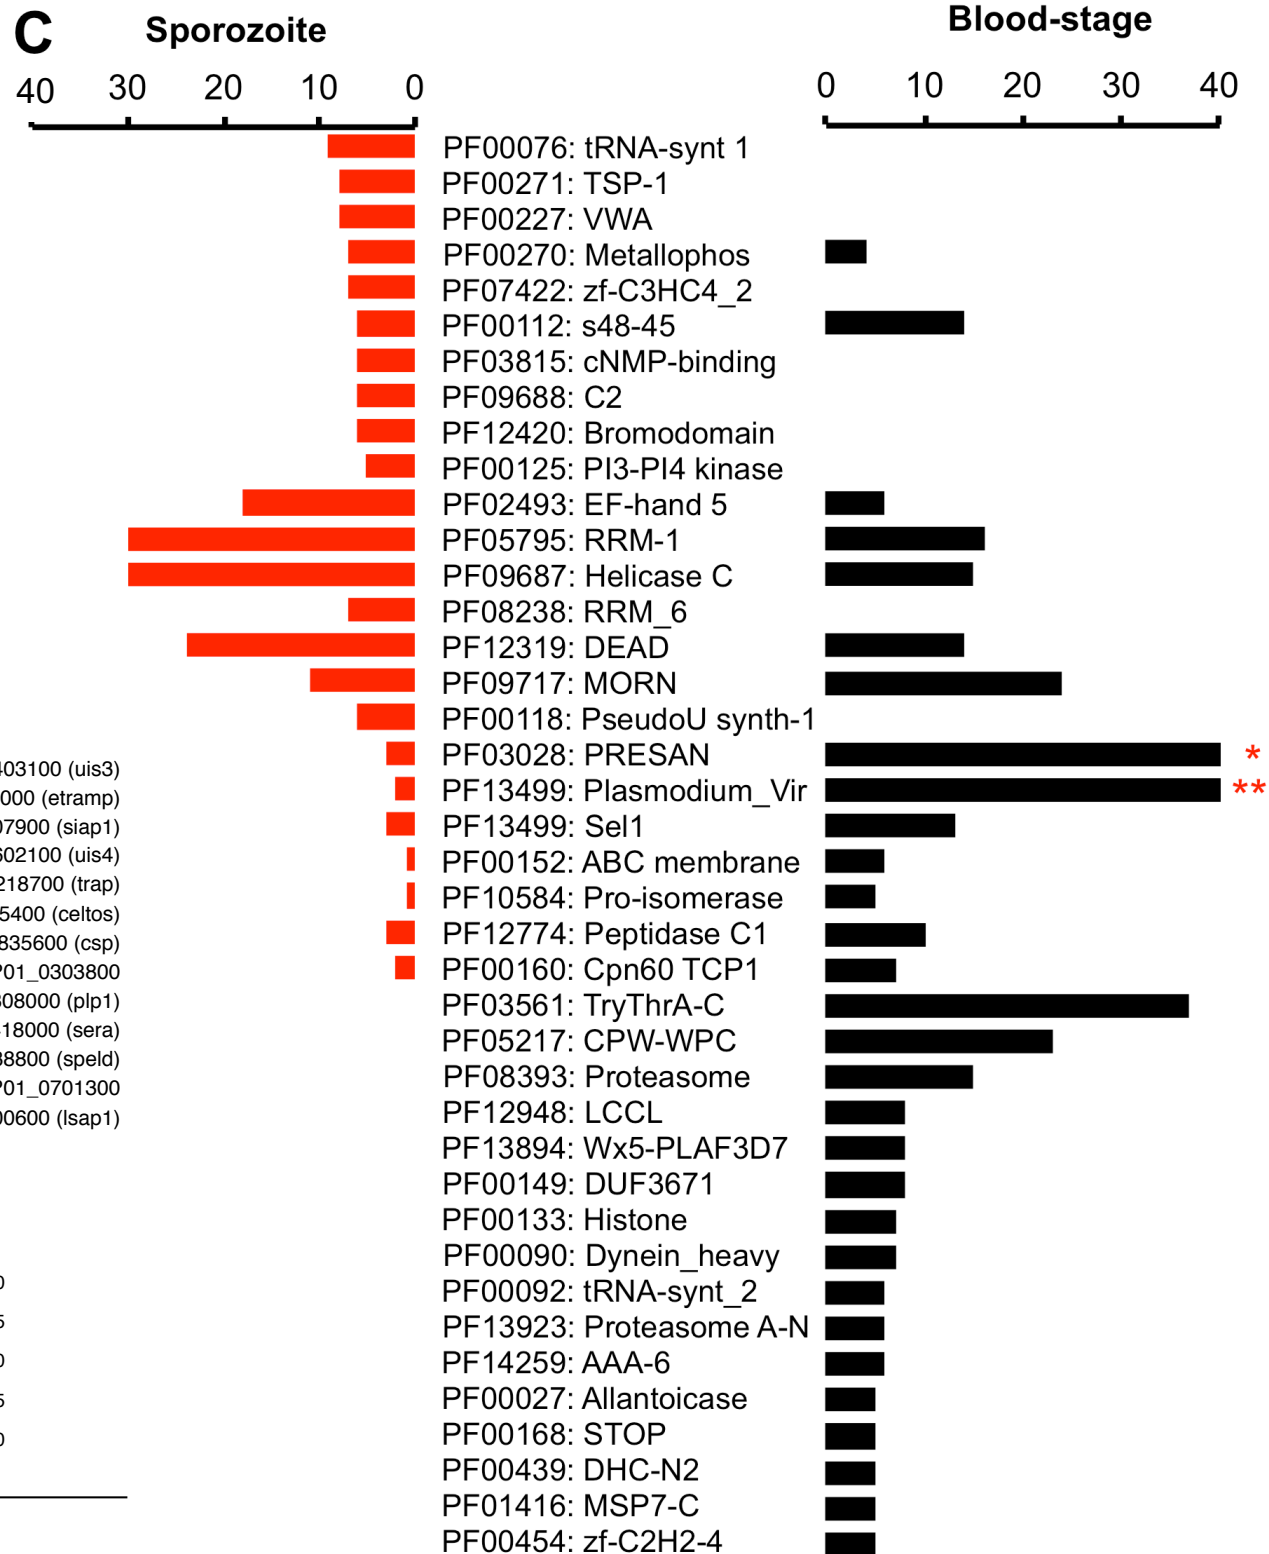

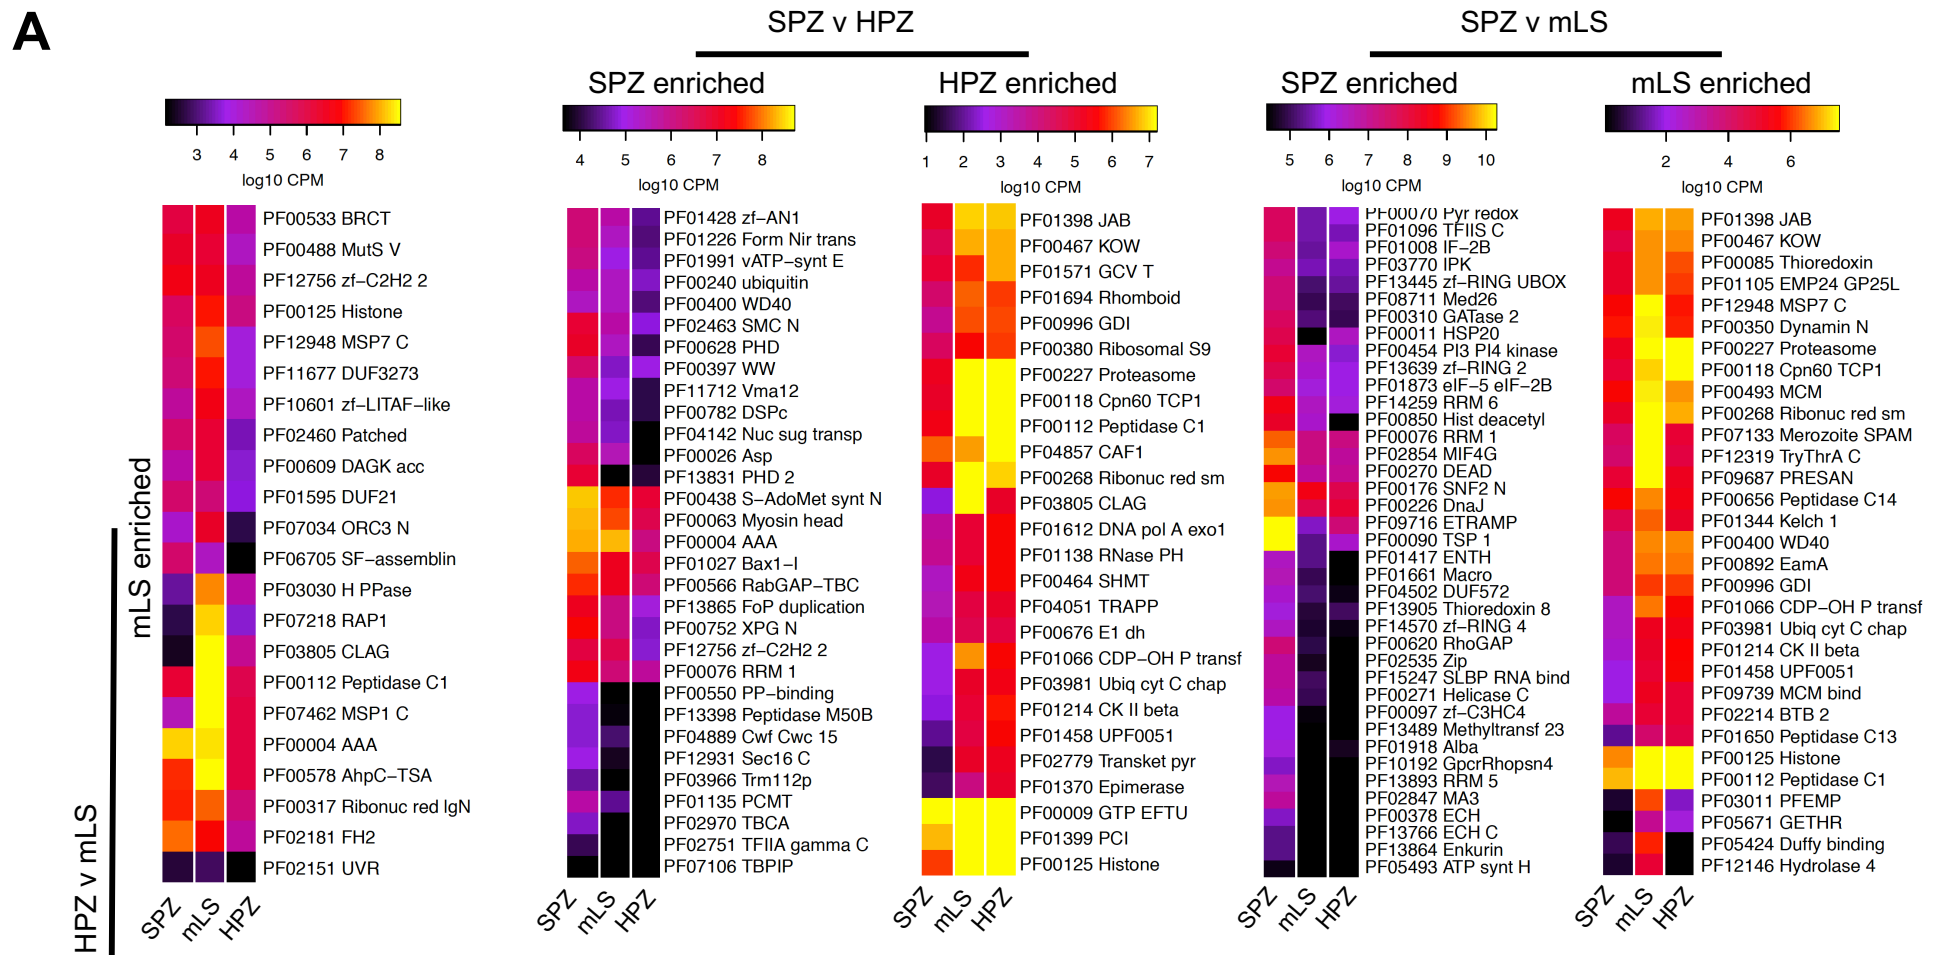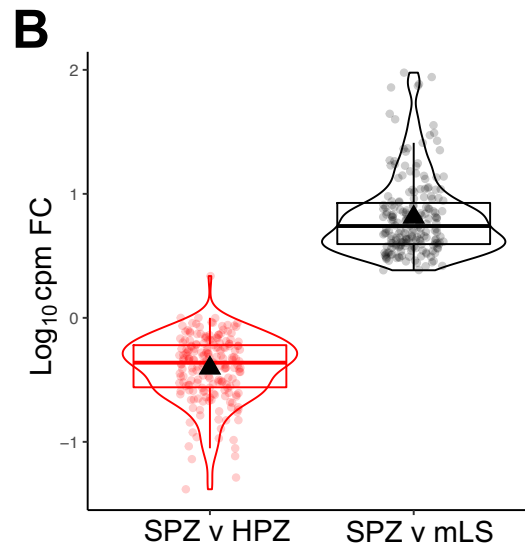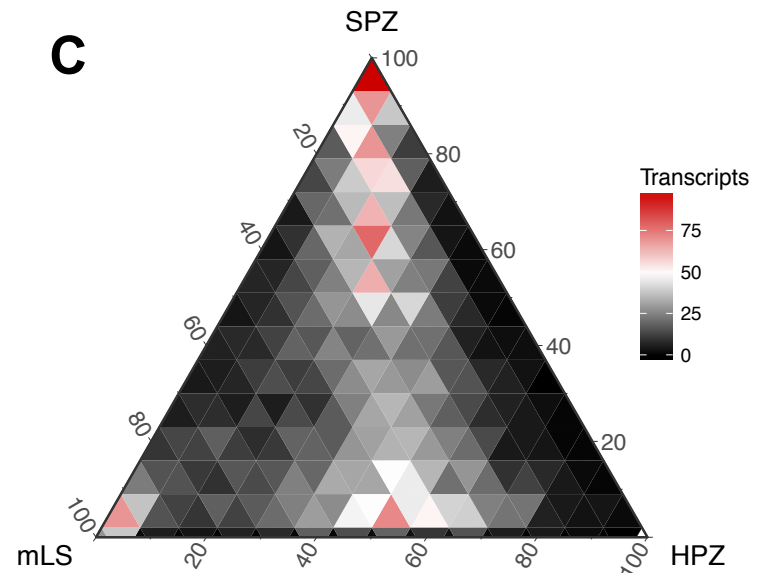

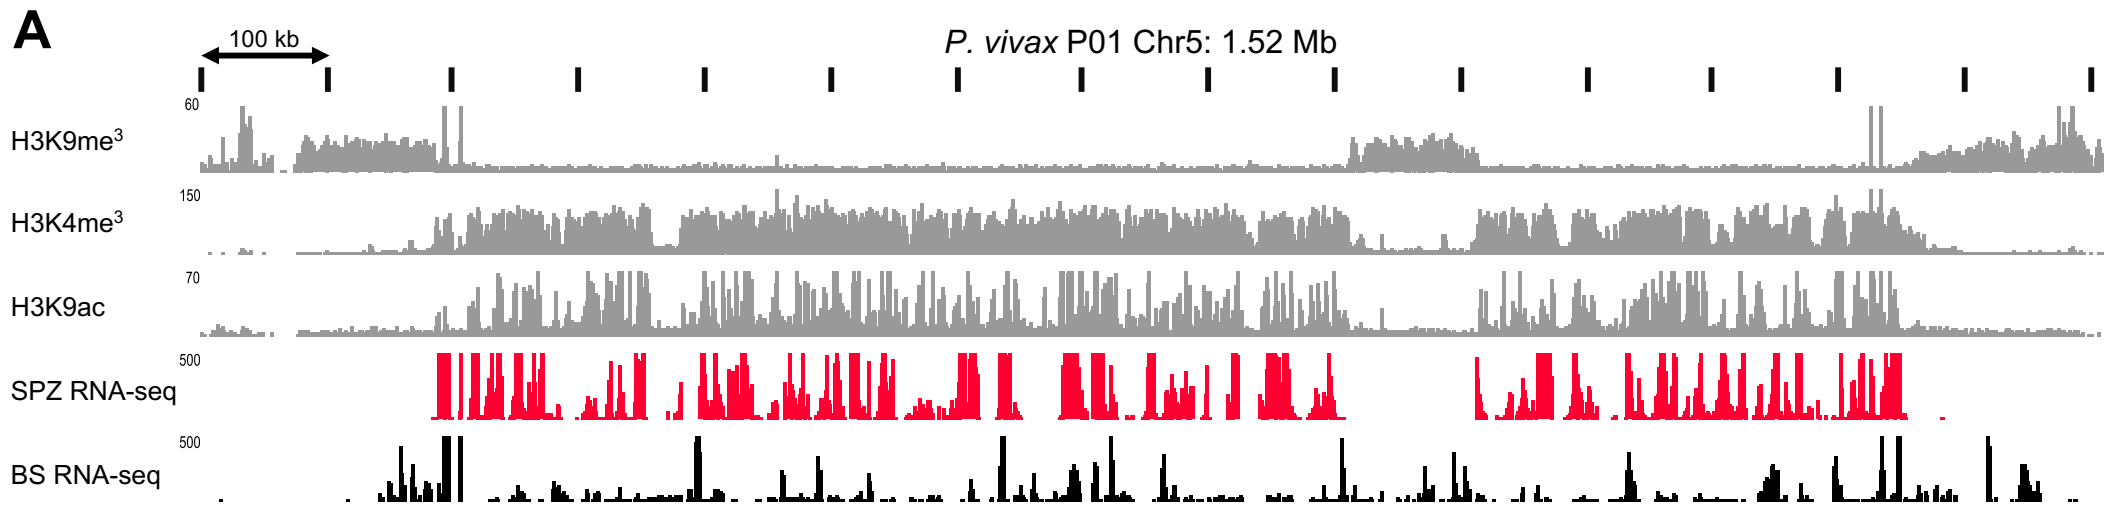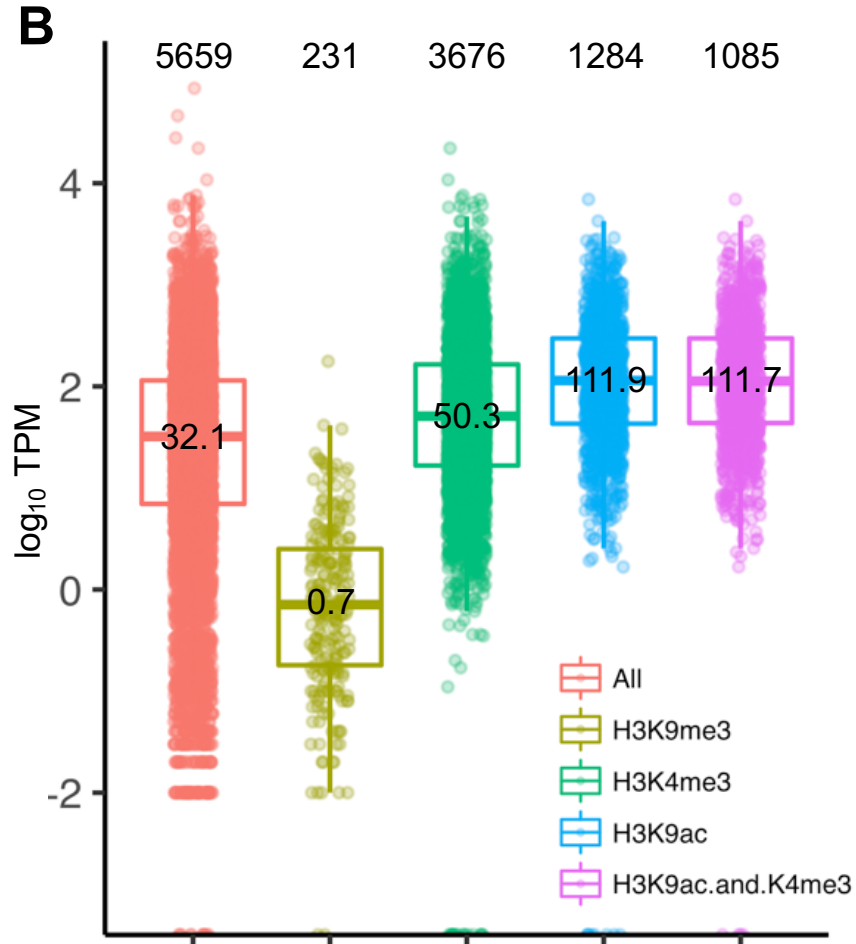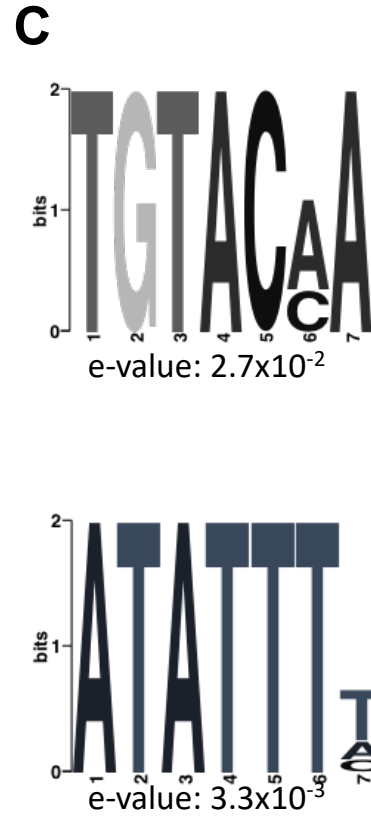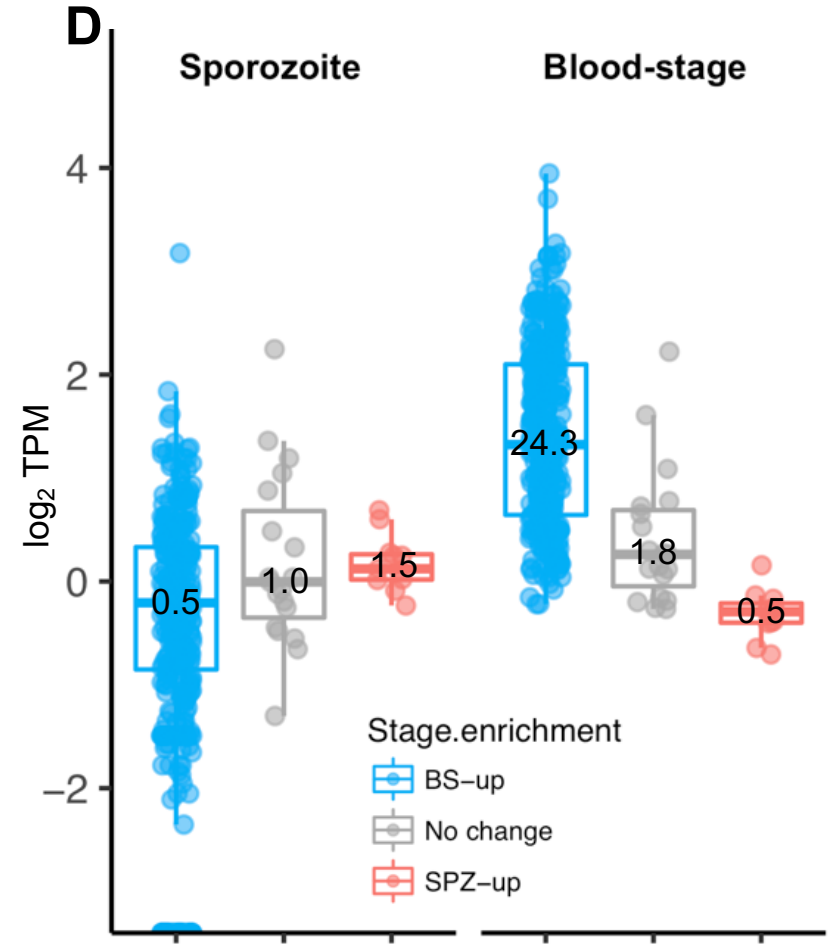

## DIFFERENTIATION

- **Translational repressors**  
e.g., Puf2, Alba2/4, HOMU, Yippee, Zipco
- **Invasion**  
e.g., Celtos, Gest
- **Liver development**  
e.g., LISP1, LISP2, ETRAMPS, TRAP
- **Transcription factors**  
e.g., AP2-SP2, AP2-L, AP2-Q?

## SUPPRESSION

- **Metabolic/replication suppressors**  
e.g., sucB, HAP2, MAK16
- **Histone arginine methylation**  
e.g., CARM1, EEML2
- **Protein translation**  
e.g., eIF-3H, Puf1

## ACTIVATION

- **Merozoite development**  
e.g., MSP1, MSP3, MSP9
- **Rhoptry function**  
e.g., RAP1, RNP2, RNP3
- **Reticuloocyte binding**  
e.g., RBP2a, RBP2b, RBP2C
- **Exported Proteins**  
e.g., PHISTs

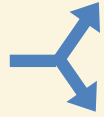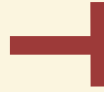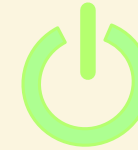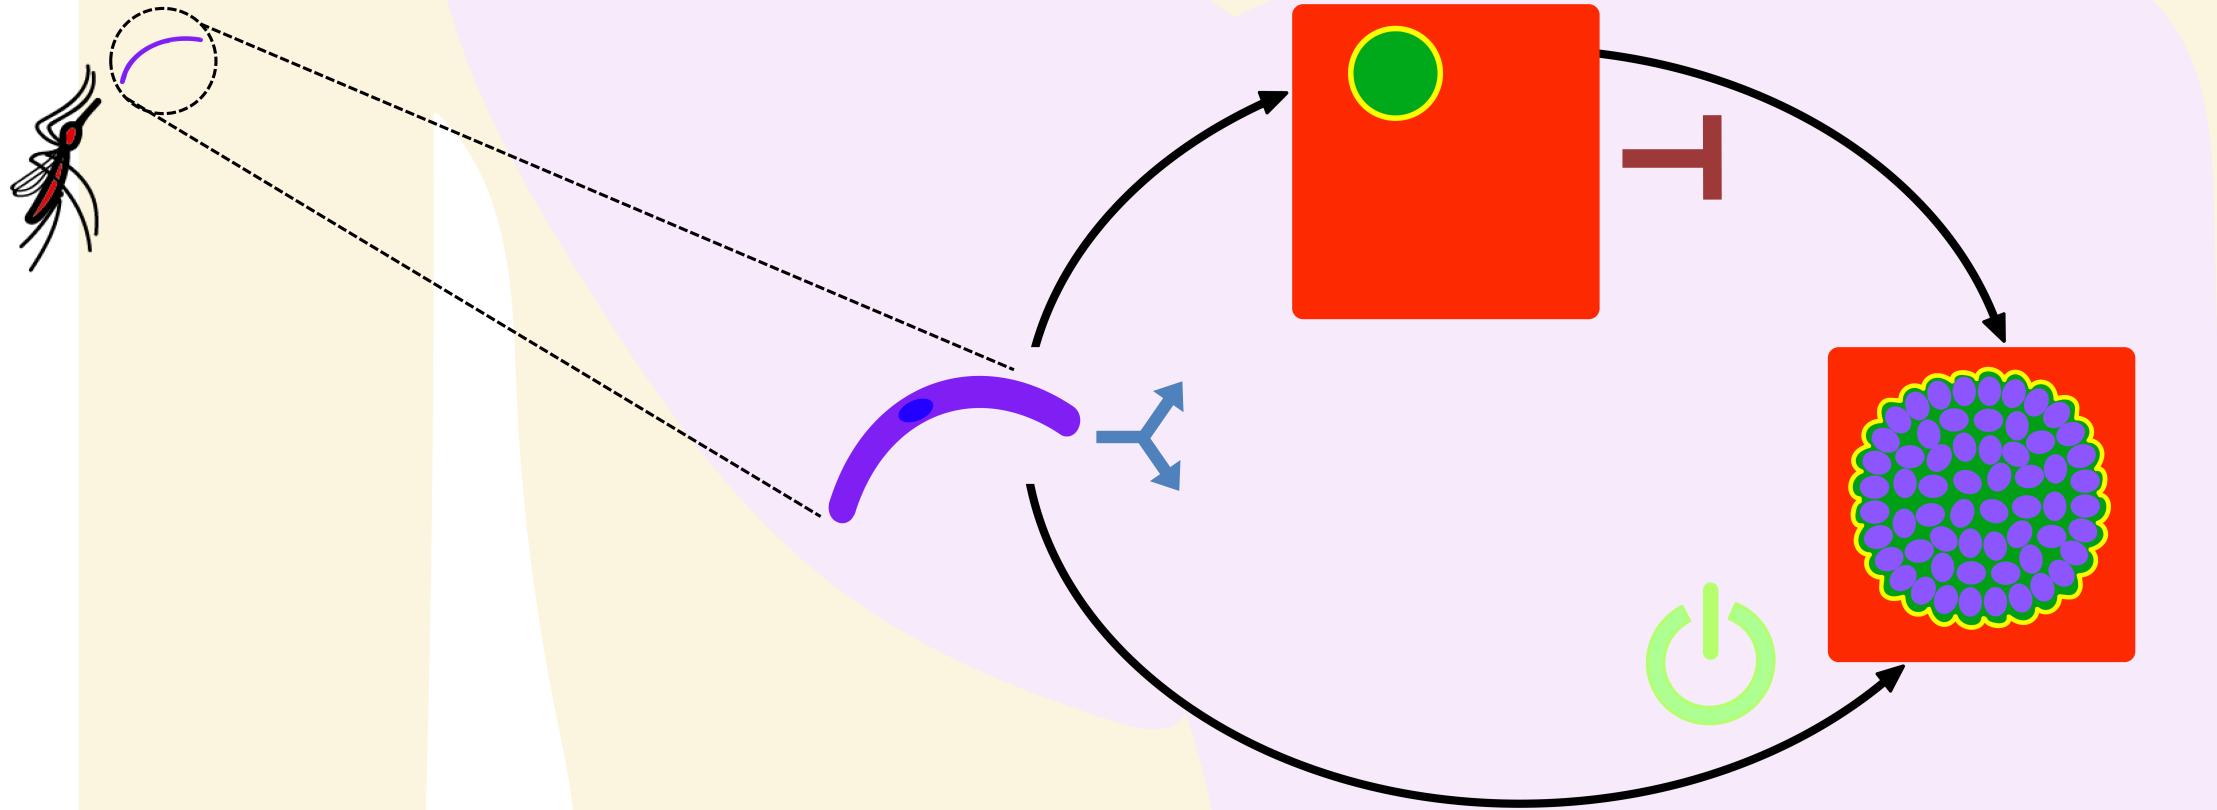

Source: https://www.biorxiv.org/content/10.1101/145250v3.full.pdf
